# Supplementary material for: Monitoring patterned enzymatic polymerization on DNA origami at single-molecule level
Source: Royal Society of Chemistry journal article supplement (doi:10.1039/c5nr01945a), 2015-01-01
Supplement: c5nr01945a1.pdf [file c5nr01945a1.pdf]

## Supporting Information

### Monitoring Patterned Enzymatic Polymerization on DNA Origami at Single-molecule level

Anders H. Okholm, Hüsnü Aslan, Flemming Besenbacher, Mingdong Dong\*, Jørgen Kjems\*.

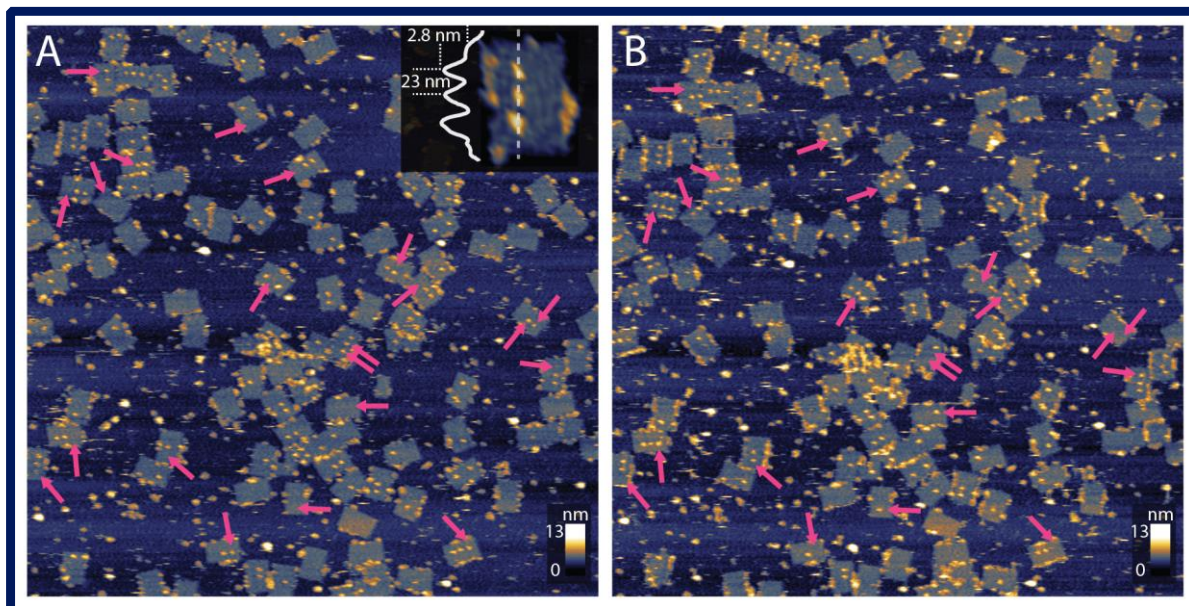

**Figure S1.** Time lapsed liquid AFM height image of DNA origami canvases with three 3' overhangs. Inset shows a single canvas and line profile (over dashed line). **(a)** DNA canvases imaged 8 min after addition of TdT and dTTP. **(b)** Same area as in (a) imaged 1 h after addition of TdT and dTTP. Transient binding of enzymes is indicated by magenta arrows. Image sizes are 2x2  $\mu\text{m}$

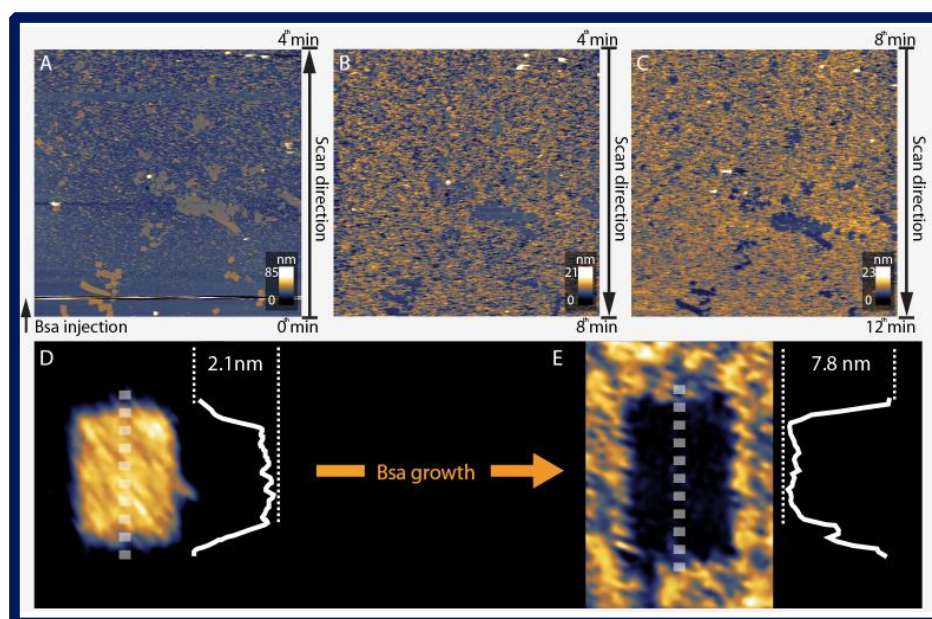

**Figure S2.** Time lapsed liquid AFM height image of BSA growth on a mica surface with DNA origami canvases. **(a)** BSA injection during scanning. DNA canvases are losing contrast due to BSA coverage. Image size is 5x5  $\mu\text{m}$  **(b,c)** Growth of BSA and increasing surface coverage in time. Image sizes are 5x5  $\mu\text{m}$ . **(d)** Single DNA canvas before BSA injection. Height measurement over the average line profile (dashed line) reads 2.1 nm. **(e)** Single DNA

canvas after BSA growth. Height measurement over the average line profile (dashed line) reads 7.8 nm with a total BSA growth of 9.9 nm over 12 minute period.

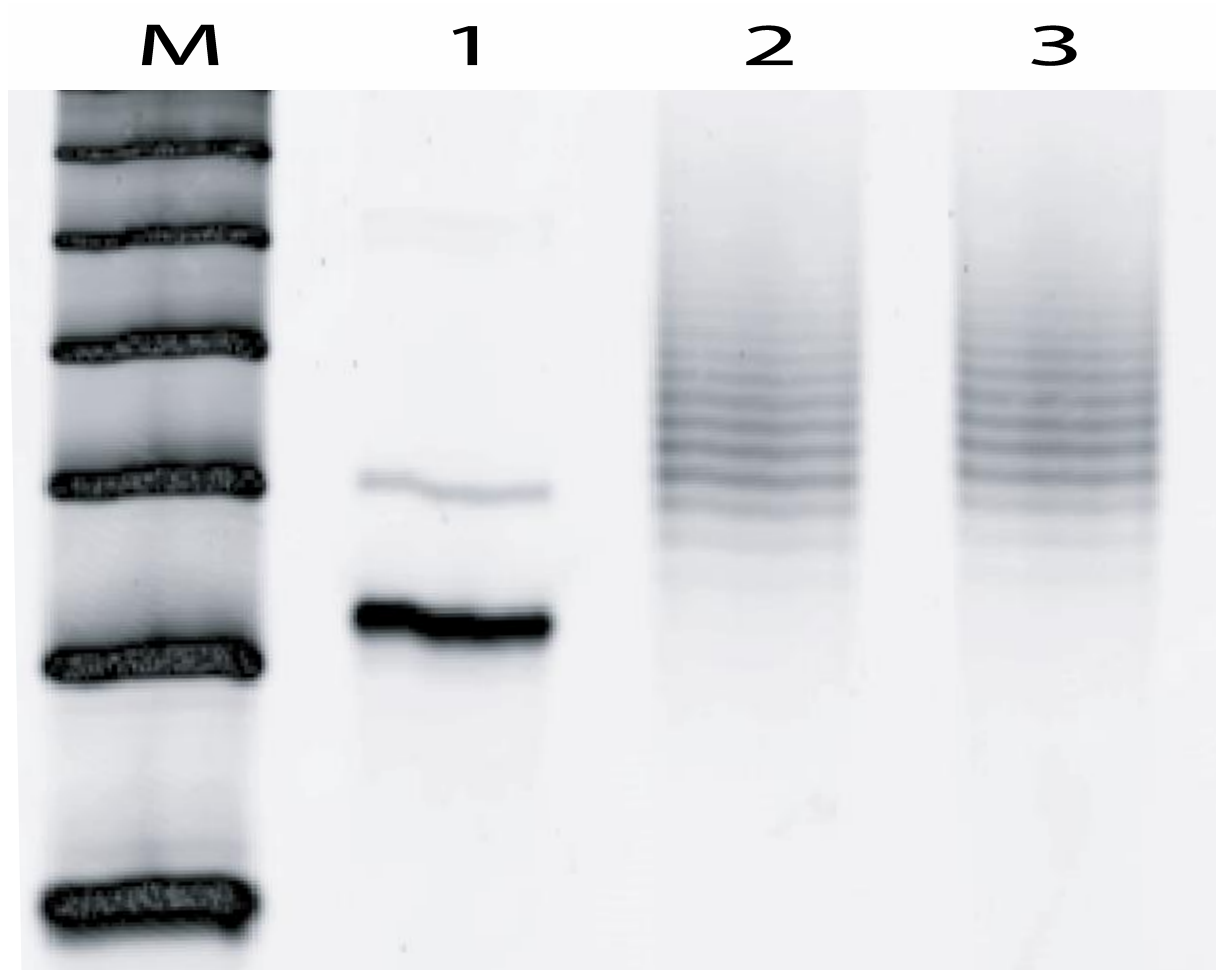

**Figure S3.** Electrophoresis mobility shift assay on polyacrylamide gel of staple strands elongated by TdT prior to annealing. **(M)** 10 bp marker. **(1)** control staple strands. **(2)** staple strands elongated by TdT in the presence of BSA. **(3)** staple strands elongated by TdT in the absence of BSA.

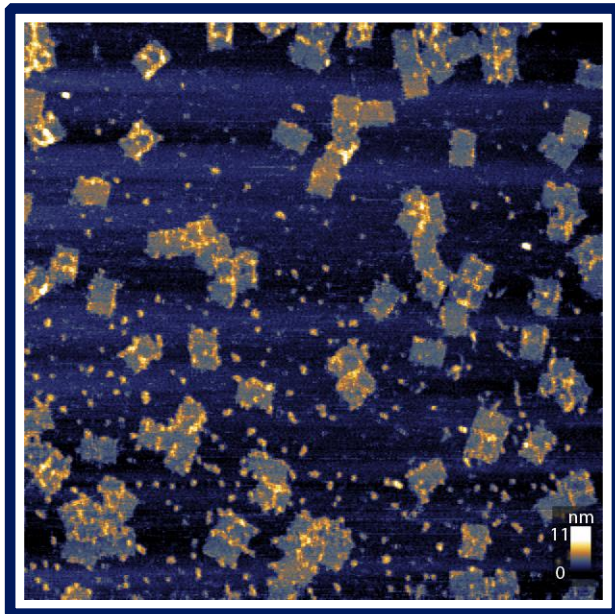

**Figure S4.** Liquid AFM height image of DNA canvases with available binding sites in the shape of the letter A in TdT buffer without BSA. Growth of nucleotide chains was not observed. Image size 2x2  $\mu\text{m}$ .

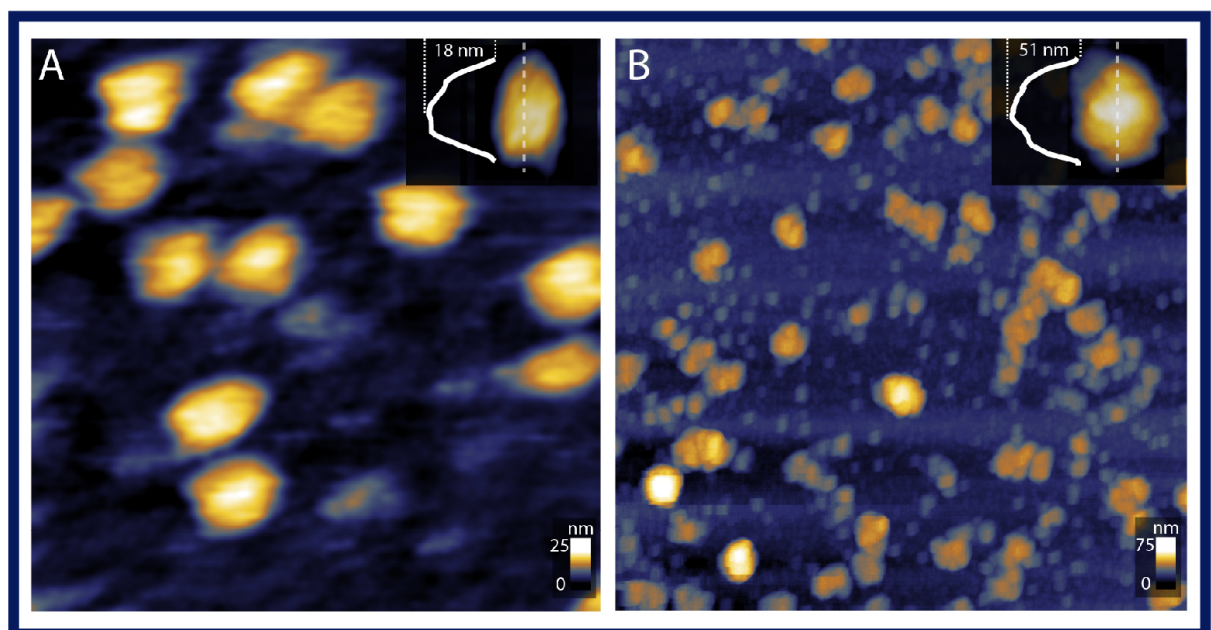

**Figure S5.** Visualization of growth after A's could no longer be resolved. Liquid AFM height images of DNA canvases with protrusions in the "A" pattern embedded in BSA. **(a)** canvases imaged 16 min after injection of TdT and dTTP. Image size 1x1  $\mu\text{m}$ . **(b)** canvases imaged 1 h after injection of TdT and dTTP. Image size 2x2  $\mu\text{m}$ .

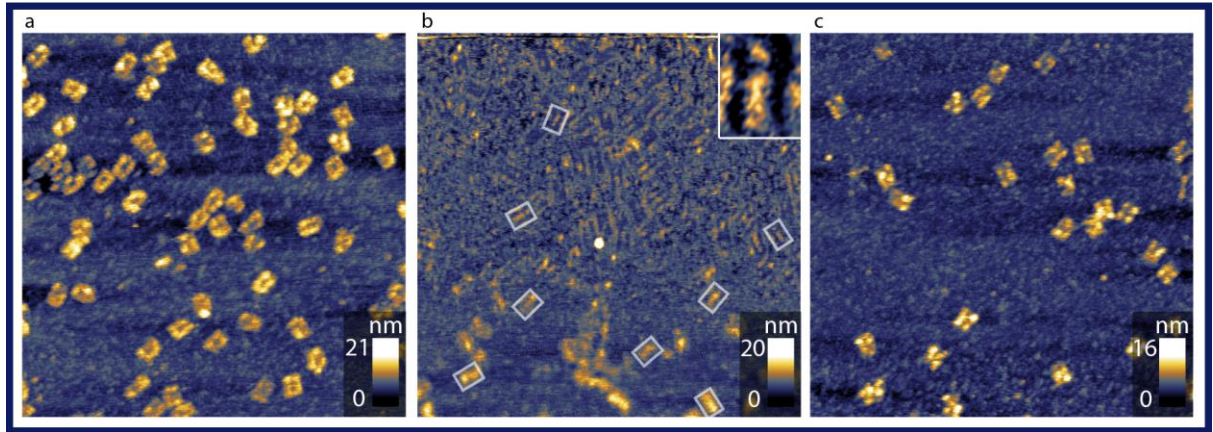

**Figure S6.** Test of different patterns of staple strand protrusions on the DNA origami. Liquid AFM height images of BSA-embedded DNA canvases with staple strand protrusions in three different patterns: **(a)** “O”, **(b)** “i” and **(c)** N. Image sizes are 2x2  $\mu\text{m}$ .

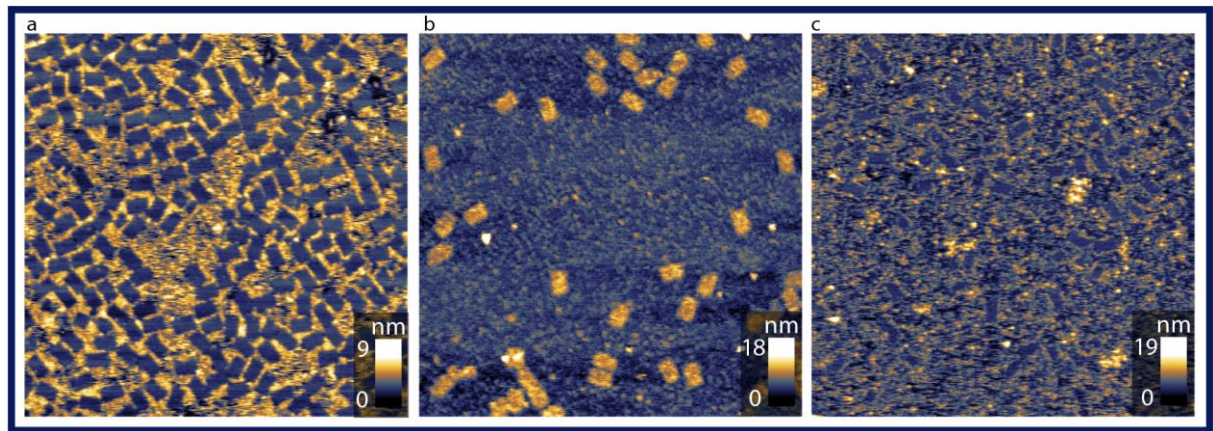

**Figure S7.** Confirmation that TdT requires 3' protruding DNA strands,  $\text{Co}^{2+}$  ions and dNTPs to polymerize DNA from DNA origami substrates. AFM images recorded 16 min after injection of TdT and complete TdT reaction buffer, except **(a)** protruding 3' ends, **(b)**  $\text{Co}^{2+}$  ions or **(c)** dTTP. Image sizes are 2x2  $\mu\text{m}$ .

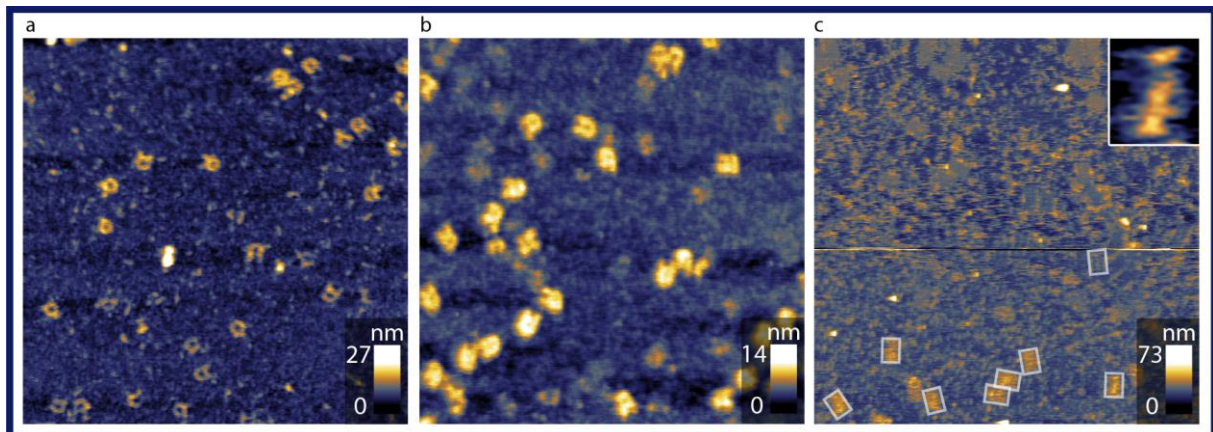

**Figure S8.** Polymerization reaction by TdT on DNA canvases using functionalized nucleotides. **(a)** Growing A's after injection of TdT and dUTP-biotin. **(b)** Growing A's after injection of TdT and dUTP-Fluorescein. **(c)** Growing i's after injection of TdT and dUTP-PEG. Streak lines in the middle of the image indicate injection point and from there on polymerization occurs. Scan direction is from top to bottom. Image sizes are 2x2  $\mu\text{m}$ .

## Experimental Section

*DNA origami:* Rectangular DNA origami structures were assembled using single stranded M13 DNA (5 nM, NEB), staple strands (20 nM, IDT), Mg(OAc)<sub>2</sub> (12.5 mM), Tris-acetate (40 mM) and EDTA (1 mM) at pH 8.3 over a 40 min thermal annealing ramp from 80 °C to 20 °C. Excess staple strands were removed by Illustra MicroSpin columns S-400 HR as described by the manufacturer (GE Healthcare). Spin columns were equilibrated with DNA origami buffer (Mg(OAc)<sub>2</sub>, Tris- acetate, EDTA) three times prior to loading of the sample.

*AFM:* 4 µl of the sample was deposited onto a freshly cleaved mica surface and left to be adsorbed for 2 min. Reaction buffer was added to the sample and the liquid cell before imaging. Samples were characterized using a MultiMode VIII AFM (Bruker, Santa Barbara, CA, USA) under ambient conditions (temperature: 21 °C and humidity: 47%). Liquid tapping was performed using triangular silicon nitride probes (nominal resonance frequency: 6 kHz, nominal spring constant: 0.02 N/m, and tip radius: 15 nm; TR400PSA, OLYMPUS, USA). Topography, phase and amplitude error images were acquired simultaneously. The linear scanning rate was set to 1–2 Hz with a scan resolution of 512 per line. Integral & amplitude gain and other scan parameters were optimized to achieve the highest possible resolution also to avoid damaging the sample or wearing the tip. Collected images were further processed using SPIP software (Image Metrology ApS, Lyngby, Denmark).

*Enzymatic reactions:* Enzymatic surface reactions were performed with TdT (2U/µl) and nucleotides (4 µM) in reaction buffer (pH 6.6) containing Potassium cacodylate (200 mM), Tris-HCl (25 mM), BSA (25 mg/ml) and CoCl<sub>2</sub> (all from Roche). BSA-free reaction buffer was prepared by spin filtration of the reaction buffer using 10 kDa MWCO Amicon Ultra spin-dialysis (10,000g; 10 min).

Staple strands, subject to elongation prior to origami assembly, were added in a final concentration of 3 µM to TdT (20U/µL) in TdT reaction buffer with nucleotides (30 µM) and left to react at 37 °C for 30 min. The reaction was terminated for 5 min at 90 °C before staple strands were analyzed on a 10% denaturing polyacrylamide gel, run for 45 min at 20W and stained with Sybr Gold.

*Nucleotides:* dTTP (Life Technologies), dUTP-16-biotin (Jena Bioscience) and Fluorescein-12-dUTP (Thermo Scientific) were commercially available. dUTP-PEG (5 kDa) was synthesized from aminoallyl-dUTP (Jena Bioscience) as previously described.<sup>[23]</sup>

#### **DNA origami designs and staple strand sequences**

All canvas designs are based on an M13 scaffold strand and 224 staple strands. All designs use the same staple strand set. Patterns are formed by choosing different subsets of staples. Images of the designs and the staple

strand sequences forming the patterns can be found below. Images were made using the software cadnano (cadnano.org). The left and the right columns are the same for all designs.

Left column

|        |        |                                                  |
|--------|--------|--------------------------------------------------|
| 1[16]  | 0[8]   | CCATGTACAGGGATAGCAAGCCCA                         |
| 3[16]  | 1[15]  | CGTTGAAAGAATTGCGAATAATAATTTTATAGGAAC             |
| 5[16]  | 3[15]  | CGGAACGAACCCTCAGCAGCGAAATTTTTTTTTTCA             |
| 7[16]  | 5[15]  | TCGAAATCTGTATCATCGCCTGATTTTTGACAGCAT             |
| 9[16]  | 7[15]  | GACGAGAACATTCAGTGAATAAGGTTTTAAATTGTG             |
| 11[16] | 9[15]  | ATACATAAGAATACCACATTCAACTTTTCTTGCCCT             |
| 13[16] | 11[15] | GAGAATGAAATGCTTTAAACAGTTTTTTAATGCAG              |
| 15[16] | 13[15] | AGAGCTTAAGAGGTCATTTTTGCGTTTTCAGAAAAC             |
| 17[16] | 15[15] | TAGTAGCAAGGTGGCATCAATTCTTTTGATGGCTT              |
| 19[16] | 17[15] | GGGTGAGATAATGTGTAGGTAAAGTTTTACTAATAG             |
| 21[16] | 19[15] | CAGGAAGATGATAATCAGAAAAGCTTTTATTCAAAA             |
| 23[16] | 21[15] | ATAGGTCAAAACGGCGATTGACCTTTTCCAAAAA               |
| 25[16] | 23[15] | GATGTGCTTATTACGCCAGCTGGCTTTTGTAATGGG             |
| 27[16] | 25[15] | CTGGGGTGAGCCGGAAGCATAAAGTTTTGAAAGGGG             |
| 29[16] | 27[15] | TCCACGCTCCCTGAGAGAGTTGCATTTTTGTAAAGC             |
| 31[4]  | 29[15] | TTTTCAAGTTTTTTGGGGTCGAACCATCACCCAAATTTTTGCAAGCGG |

Right column

|         |         |                                                  |
|---------|---------|--------------------------------------------------|
| 0[235]  | 2[224]  | TTTTTGAAAGTATTAAGAGGCTATTATTCTGAAACATTTTGTGACAGC |
| 2[223]  | 4[224]  | ATTGGCCTCAGGAGGTTGAGGCAGTTTTGCGTCAGA             |
| 4[223]  | 6[224]  | CTGTAGCGATCAAGTTTGCCTTTATTTTAGACAAAA             |
| 6[223]  | 8[224]  | GGGCGACAGGTTTACCAGCGCCAATTTTGCAGATAG             |
| 8[223]  | 10[224] | CCGAACAATTTTTAAGAAAAGTAATTTAACGTCAA              |
| 10[223] | 12[224] | AAATGAAAAACGATTTTTTGTTTTTTGCTTATCC               |
| 12[223] | 14[224] | GGTATTCTAAATCAGATATAGAAGTTTTACGCGCCT             |
| 14[223] | 16[224] | GTTTATCAGTTCAGTAATGCAGATTTTGAAAAGC               |
| 16[223] | 18[224] | CTGTTTAGGGAATCATAATTACTATTTTCATAGGTC             |
| 18[223] | 20[224] | TGAGAGACGTGAATTTATCAAATTTTTGAAGATGA              |
| 20[223] | 22[224] | TGAAACAAAATTACCTGAGCAAAATTTTACTTCTGA             |
| 22[223] | 24[224] | ATAATGGATGATTGTTTGGATTATTTTTGCCGTCAA             |
| 24[223] | 26[224] | TAGATAATCAACTAATAGATTAGATTTTCCAGCAGA             |
| 26[223] | 28[224] | AGATAAAAAATACCGAACGAACCATTTTCTACATTT             |
| 28[223] | 30[224] | TGACGCTCAGGCTCATGGAAATACTTTTCCAGGAACG            |
| 30[223] | 31[231] | GTACGCCATTAAAGGGATTTTAGA                         |

---

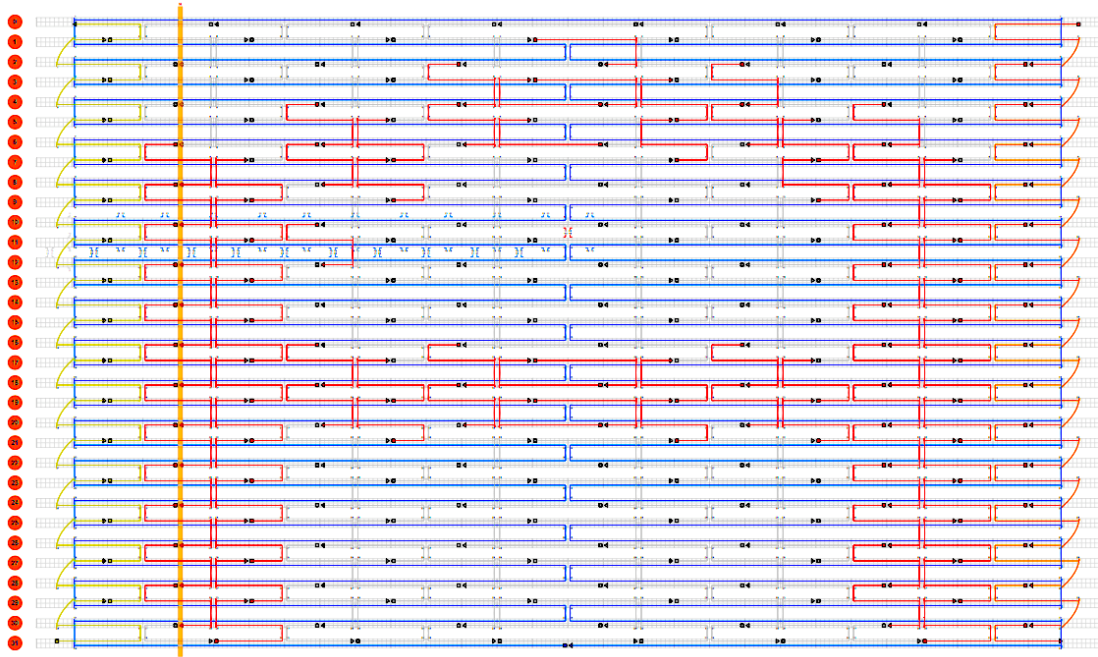

A

|         |         |                                   |
|---------|---------|-----------------------------------|
| 1[112]  | 2[128]  | TTTGTCTGATACAGGAGTGTACTATACATGG   |
| 2[95]   | 4[96]   | TTTCTGTAGTGAATTTCTTAACAACAACCAT   |
| 2[159]  | 4[160]  | GAATTTACCCCTCAGAGCCACCACTCTTTTCA  |
| 3[112]  | 4[128]  | CCGATAGTCTCCCTCAGAGCCGCCACCACC    |
| 4[63]   | 6[64]   | AGGCTTGCAAAGACTTTTTTCATGATGACCCCC |
| 4[95]   | 6[96]   | CGCCACGCGGGTAAAATACGTAAGAGGCAAA   |
| 4[127]  | 3[111]  | GGAACCGCTGCGCCGACAATGACAGCTTGATA  |
| 4[159]  | 6[160]  | TAATCAAATAGCAAGGCCGAAACTAAAGGTG   |
| 4[191]  | 6[192]  | TAGCCCCCTCGATAGCAGCACCGTAGGGAAGG  |
| 5[144]  | 3[143]  | ATTACCATATCACCGGAACCAGAGACCCTCAG  |
| 6[31]   | 8[32]   | CGGAGATTCGCGACCTGCTCCATGACGTAACA  |
| 6[63]   | 8[64]   | AGCGATTAAGGCGCAGACGGTCAATGACAAGA  |
| 6[127]  | 5[111]  | GAATTAGACCAACCTAAAACGAAATGCCACTA  |
| 6[191]  | 8[192]  | TAAATATTTATTTTGTCAATCCCGAGGAA     |
| 7[80]   | 5[79]   | GAACCGAACTAAAACACTCATCTTGGAAGTTT  |
| 7[144]  | 5[143]  | GCAACATACCGTCACCGACTTGAGGTAGCACC  |
| 7[176]  | 5[175]  | GAATAAGTGACGGAAATTATTCATGTCACCAA  |
| 8[31]   | 10[32]  | AAGCTGCTACACCAGAACGAGTAGATCAGTTG  |
| 8[191]  | 10[192] | ACGCAATAATGAAATAGCAATAGCAGAGAATA  |
| 9[48]   | 7[47]   | GCTTGAGATTCATTACCCAAATCATTACTTAG  |
| 9[80]   | 7[79]   | TGTGAATTTTCATCAAGAGTAATCTTCATAAGG |
| 9[176]  | 7[175]  | AAGAAACAATAACGGAATACCCAAACACCACG  |
| 9[208]  | 7[207]  | CGAAGCCCAGTTACCAGAAGGAAAAATAGAAA  |
| 10[31]  | 12[32]  | AGATTTAGCGCAAAAAGGAATTACCATTGAAT  |
| 10[191] | 12[192] | ACATAAAAACAGCCATATTTTATTAGCGAA    |
| 11[48]  | 9[47]   | GTAAGAGCACAGGTAGAAAAGATTCTAAATTGG |
| 11[208] | 9[207]  | CAAATAAGATAGCAGCCTTTACAGTATCTTAC  |

|         |         |                                   |
|---------|---------|-----------------------------------|
| 12[31]  | 14[32]  | CCCCCTCACCATAAATCAAAAATCATTGCTCC  |
| 12[191] | 14[192] | CCTCCCGACGTAGGAATCATTACCGAACAAGA  |
| 13[48]  | 11[47]  | ACCCTGACAATCGTCATAAATATTGAGGCATA  |
| 13[208] | 11[207] | TAGCAAGCAAGAACGCGAGGCGTTTCCCAATC  |
| 14[31]  | 16[32]  | TTTTGATAATTGCTGAATATAATGGGGGCGCG  |
| 14[191] | 16[192] | AAAATAATAATTCTGTCCAGACGACAAAATTCT |
| 15[48]  | 13[47]  | CAACATGTTTAGAGAGTACCTTTAAGGTCTTT  |
| 15[208] | 13[207] | AACAACATACAATAGATAAGTCCTGCGCCCAA  |
| 16[31]  | 18[32]  | AGCTGAAATTAACATCCAATAAATAAATGCAA  |
| 16[63]  | 18[64]  | ACCTGTTTAGAATTAGCAAAATTAGGATAAAA  |
| 16[95]  | 18[96]  | GACCATTAAGCATAAAGCTAAATCCTTTTGCG  |
| 16[159] | 18[160] | CTTAATTGCTAAATTTAATGGTTTTGCTGATG  |
| 16[191] | 18[192] | TACCAGTAGATAAATAAGGCGTTAGGCTTAGG  |
| 17[48]  | 15[47]  | CAAGGCAAAGCTATATTTTCATTTCTGTAGCT  |
| 17[112] | 18[128] | CAAAAACACAAATATATTTTAGTTCGCGAGAA  |
| 17[208] | 15[207] | TAAACACCTATCATATGCGTTATACGACAATA  |
| 18[31]  | 20[32]  | TGCCTGAGAAGGCCGGAGACAGTCTCATATGT  |
| 18[63]  | 20[64]  | ATTTTTAGGATATTCAACCGTTCTGATGAACG  |
| 18[95]  | 20[96]  | GGAGAAGCCCGGAGAGGGTAGCTATTGCCTGA  |
| 18[127] | 17[111] | AACTTTTTTATGACCCTGTAATAGGTTGTAC   |
| 18[159] | 20[160] | CAAATCCATTTTCCTTAGAATCCCCTTTTTT   |
| 18[191] | 20[192] | TTGGGTTAAGCTTAGATTAAGACGATTAATTA  |
| 19[48]  | 17[47]  | ATCAATATAACCCCTCATATATTTTCATACAGG |
| 19[80]  | 17[79]  | AATTAATGCTTTATTTCAACGCAAAGCAATAA  |
| 19[112] | 20[128] | AGATCTACCCTTGCTTCTGTAATATATGTGA   |
| 19[144] | 17[143] | TTAATTAATCGCAAGACAAAGAAAATTCAT    |
| 19[176] | 17[175] | ATAGCGATTATAACTATATGTAAAGAAATACC  |
| 19[208] | 17[207] | AGTCAATATACCTTTTTAACCTCCAATAAGAA  |
| 20[31]  | 22[32]  | ACCCCGTTTTGTATAAGCAAATATGATTCTCC  |
| 20[127] | 19[111] | GTGAATAAAAAGGCTATCAGGTCATTTTGTAG  |
| 20[191] | 22[192] | CATTTAACACAAAATCGCGCAGAGATATCAAA  |
| 21[48]  | 19[47]  | TAAACGTAAAACACTAGCATGTCAAAAATCACC |
| 21[80]  | 19[79]  | AATTTTTGAGCAAACAAGAGAATCAGCTGATA  |
| 21[144] | 19[143] | AACAATAACAGTACATAAATCAATCGTCGCTA  |
| 21[176] | 19[175] | ACCAAGTTAATTTCAATTTGAATTATTGAAAAC |
| 21[208] | 19[207] | TTCATTTACATCAAGAAAACAACTGAGAAG    |
| 22[31]  | 24[32]  | GTGGGAACCGTTGGTGTAGATGGGGTGCGGGC  |
| 22[191] | 24[192] | ATTATTTGTATCAGATGATGGCAAAGTATTA   |
| 23[48]  | 21[47]  | AACCGTGCGAGTAACAACCCGTCGTTAAATTG  |
| 23[208] | 21[207] | TATAATCCAGGGTTAGAACCCTACCGGAATTA  |
| 24[31]  | 26[32]  | CTCTTCGCGCAAGGCGATTAAGTTTTCCACAC  |
| 24[191] | 26[192] | GACTTTACAAGGTTATCTAAAATAAGTATTAA  |
| 25[48]  | 23[47]  | CCAGGGTTTTGGGAAGGGCGATCGCGCATCGT  |
| 25[208] | 23[207] | AGCACTAAACATTTGAGGATTTAGTTCATCAA  |
| 26[31]  | 28[32]  | AACATACGCCTAATGAGTGAGCTAGCCCTTCA  |
| 26[191] | 28[192] | CACCGCCTCGAACTGATAGCCCTATTATTAC   |



|         |         |                                         |
|---------|---------|-----------------------------------------|
| 27[48]  | 25[47]  | TAATTGCGTGTTATCCGCTCACAAGGGTAACG        |
| 27[208] | 25[207] | CCATTAAACAGAGGTGAGGCGGTCTCTTTAGG        |
| 28[31]  | 30[32]  | CCGCCTGGGGTTTGGCCAGCAGGCGATGGCC         |
| 28[191] | 30[192] | ATTGGCAGCAATATTACCGCCAGCTTTTATAA        |
| 29[48]  | 27[47]  | CTGTTTGACGGGCAACAGCTGATTACTCACAT        |
| 29[208] | 27[207] | CAGGAAAAAATCGTCTGAAATGGAAAACATCG        |
| 31[40]  | 29[47]  | CTAAATCGGAACCTAAAACCGTCTATCAGGGCGAAAATC |
| 31[200] | 29[207] | CTAAACAGGAGGCCGAGAATCCTGAGAAGTGCATTGCAA |

A background

|        |         |                                          |
|--------|---------|------------------------------------------|
| 0[39]  | 2[32]   | CACCACCCTCATTTTCCGTAACACTGAGTTTCAAAGGAAC |
| 0[71]  | 2[64]   | ACCGCCACCCTCAGAAACAACGCCTGTAGCATAACTTTCA |
| 0[103] | 2[96]   | TACTCAGGAGGTTTAGATAGTTAGCGTAACGAAAATGAAT |
| 0[135] | 0[104]  | TATAAGTATAGCCCGGAATAGGTGTATCACCG         |
| 0[167] | 2[160]  | ACCAGGCGGATAAGTGGGGTTCAGTGCCTTGACAGTCTCT |
| 0[199] | 2[192]  | GAAGGATTAGGATTAGAAACAGTTAATGCCCCATAAATCC |
| 1[48]  | 0[40]   | TACAAACTCCGCCACCCTCAGAGC                 |
| 1[80]  | 0[72]   | CAGCCCTCTACCGCCACCCTCAGA                 |
| 1[144] | 0[136]  | GTTTTAACCCGTCGAGAGGGTTGA                 |
| 1[176] | 0[168]  | GCCCGTATCGGGTTTTGCTCAGT                  |
| 1[208] | 0[200]  | TTCGGAACCTGAGACTCCTCAAGA                 |
| 2[31]  | 4[32]   | AACTAAAGATCTCAAAAAAAAAGGCTTTTGCG         |
| 2[63]  | 4[64]   | ACAGTTTCTAATTGTATCGGTTTAGGTCGCTG         |
| 2[127] | 1[111]  | CTTTTGATCTTTCCAGACGTTAGTTCTAAAGT         |
| 2[191] | 4[192]  | TCATTAAGAACCACCACCAGAGTTCGGTCA           |
| 3[48]  | 1[47]   | GGAGCCTTAGCGGAGTGAGAATAGGTCACCAG         |
| 3[80]  | 1[79]   | CTTTCGAGTGGGATTTTGCTAAACTCCACAGA         |
| 3[144] | 1[143]  | AACCGCCACGTTCCAGTAAGCGTCGGTAATAA         |
| 3[176] | 1[175]  | CCGCCACCGCCAGAATGGAAAGCGGTAACAGT         |
| 3[208] | 1[207]  | AGCATTGATGATATTCACAAACACTGCCTAT          |
| 4[31]  | 6[32]   | GGATCGTCGGGTAGCAACGGCTACAAGTACAA         |
| 5[48]  | 3[47]   | TGAGGACTAGGGAGTTAAAGGCCGCTCAAAAA         |
| 5[80]  | 3[79]   | CCATTAAACATAACCGATATATTCTCAGCTTG         |
| 5[112] | 6[128]  | CGAAGGCAGCCAGCAAAATCACCACCATTGG          |
| 5[176] | 3[175]  | TGAAACCATTATTAGCGTTTGCCACCTCAGAG         |
| 5[208] | 3[207]  | GCGACAGACGTTTTATCGGCATTCCGCCGCC          |
| 6[95]  | 8[96]   | AGAATACTGACCAACTTTGAAAATAGGCTG           |
| 6[159] | 8[160]  | AATTATCATAAAAGAAACGCAAAGAAGAACTG         |
| 7[48]  | 5[47]   | CCGGAACGTACCAAGCGCGAAACAAGAGGCTT         |
| 7[112] | 8[128]  | ATGAACGGGTAGAAAATACATACAGTATGT           |
| 7[208] | 5[207]  | ATTCATATTTCAACCGATTGAGGGAATCAGTA         |
| 8[63]  | 10[64]  | ACCGGATATGGTTTAATTTCAACTACGGAACA         |
| 8[95]  | 10[96]  | GCTGACCTACCTTATGCGATTTTAGGAAGAAA         |
| 8[127] | 7[111]  | TAGCAAAGTACAGACCAGGCGGAGGACAG            |
| 8[159] | 10[160] | GCATGATTTGAGTTAAGCCCAATAGACGGGAG         |
| 9[112] | 10[128] | CTCATTATGCGCTAATATCAGAGAGTCAGAGG         |

|         |         |                                    |
|---------|---------|------------------------------------|
| 9[144]  | 7[143]  | ACAAGAATAAGACTCCTTATTACGTAAAGGTG   |
| 10[63]  | 12[64]  | ACATTATTAACACTATCATAACCCGCGTCCAA   |
| 10[95]  | 12[96]  | AATCTACGGATAAAAACCAAATAAGGGGGTA    |
| 10[127] | 9[111]  | GTAATTGAACCAGTCAGGACGTTGAGAACTGG   |
| 10[159] | 12[160] | AATTAACTTTCCAGAGCCTAATTTAAGCCTTA   |
| 11[80]  | 9[79]   | CAGACGACTTAATAAAACGAACTATTAATCAT   |
| 11[112] | 12[128] | CTTTTGCAATCCTGAATCTTACCAACCCAGCT   |
| 11[144] | 9[143]  | GAGCGTCTGAACACCCTGAACAAAGATAACCC   |
| 11[176] | 9[175]  | CAAAATAAACAGGGAAGCGCATTATAAGAGC    |
| 12[63]  | 14[64]  | TACTGCGGTATTATAGTCAGAAGCCTCCAACA   |
| 12[95]  | 14[96]  | ATAGTAAAAAAGATTAAGAGGAACGAGCTTC    |
| 12[127] | 11[111] | ACAATTTTAAAGAAGTTTTGCCAGGCGAGAGG   |
| 12[159] | 14[160] | AATCAAGAATCGAGAACAAGCAAGCGAGCATG   |
| 13[80]  | 11[79]  | TTGCATCAATGTTTAGACTGGATATCGTTTAC   |
| 13[112] | 14[128] | GACTTCAACAAGAACGGGTATTAATCTTTCCT   |
| 13[144] | 11[143] | CCGCACTCTTAGTTGCTATTTTGCACGCTAAC   |
| 13[176] | 11[175] | ATTTTCATCTTGCGGGAGTTTTGGCCAGTTA    |
| 14[63]  | 16[64]  | GGTCAGGATTTAAATATGCAACTAGGTCAATA   |
| 14[95]  | 16[96]  | AAAGCGAAAGTTTCATTCCATATATTTAGTTT   |
| 14[127] | 13[111] | TATCATTCATATCGCGTTTTAATTGCCCGAAA   |
| 14[159] | 16[160] | TAGAAACCAGAGAATATAAAGTACCAGTAGGG   |
| 15[80]  | 13[79]  | TGTCTGGACCAGACCGGAAGCAAAAAGCGGA    |
| 15[112] | 16[128] | TTCCCAATATTTAGGCAGAGGCATACAACGCC   |
| 15[144] | 13[143] | CAGTAATAAATCAATAATCGGCTGACCAAGTA   |
| 15[176] | 13[175] | GGTAAAGTATCCCATCCTAATTTACCGTTTTT   |
| 16[127] | 15[111] | AACATGTATCTGCGAACGAGTAGAACAGTTGA   |
| 17[80]  | 15[79]  | AGCCTCAGGATACATTTGCGAAATAAGTACGG   |
| 17[144] | 15[143] | CTTCTGACAGAATCGCCATATTTATTTGAGC    |
| 17[176] | 15[175] | GACCGTGTTAAAGCCAACGCTCAACGACAAAA   |
| 20[63]  | 22[64]  | GTAATCGTAATATTTTGTTAAAATAACATTAA   |
| 20[95]  | 22[96]  | GAGTCTGGTTAAATCAGCTCATTTGCGTCTG    |
| 20[159] | 22[160] | AATGGAAACGGATTCGCCTGATTGAAAGAAAT   |
| 21[112] | 22[128] | ATAGGAACAACAGTACCTTTTACACAGATGAA   |
| 22[63]  | 24[64]  | ATGTGAGCATCTGCCAGTTTGAGGTCAGGCTG   |
| 22[95]  | 24[96]  | GCCTTCCTGGCCTCAGGAAGATCGTGCCGGAA   |
| 22[127] | 21[111] | TATACAGTGCCATCAAAAATAATTTTAAACCA   |
| 22[159] | 24[160] | TGCGTAGAAGAAGGAGCGGAATTACGTATTAA   |
| 23[80]  | 21[79]  | ACAGTATCGTAGCCAGCTTTCATCTCGCATT    |
| 23[112] | 24[128] | CCAGCTTTACATTATCATTTTGCCTTAAAAAG   |
| 23[144] | 21[143] | AAACCACCTTTTTCAGGTTTAAACGTTGCGGAGA |
| 23[176] | 21[175] | TTCCTGATCACGTAAAACAGAAATCTTTGAAT   |
| 24[63]  | 26[64]  | CGCAACTGTTCCAGTCACGACGTGTTTCCTG    |
| 24[95]  | 26[96]  | ACCAGGCAGTGCCAAGCTTGCCATGCCGAGCTC  |
| 24[127] | 23[111] | TTTGAGTACCGGCACCGCTTCTGGCACTCCAG   |
| 24[159] | 26[160] | ATCCTTTGGTTGGCAAATCAACAGGAGAGCCA   |
| 25[80]  | 23[79]  | GACGGCCAAAGCGCCATTGCCATGGACGACG    |

|         |         |                                          |
|---------|---------|------------------------------------------|
| 25[112] | 26[128] | TCGACTCTCAAATATCAAACCCTCTCACCTTG         |
| 25[144] | 23[143] | TCTGGTCACCCGAACGTTATTAATGAACAAAG         |
| 25[176] | 23[175] | AATTGAGGAAACAATTCGACAACCTTCATCATA        |
| 26[63]  | 28[64]  | TGTGAAATTTGCGCTCACTGCCCGCTTTTCAC         |
| 26[95]  | 28[96]  | GAATTCGTCTGTCTGCGCAGCTGCGGTTTGC          |
| 26[127] | 25[111] | CTGAACCTAGAGGATCCCCGGGTACCTGCAGG         |
| 26[159] | 28[160] | GCAGCAAAATATTTTTGAATGGCTACCAGTAA         |
| 27[80]  | 25[79]  | TCGGGAAAAATCATGGTCATAGCTTGTA AAC         |
| 27[112] | 28[128] | AATCGGCCACCTGAAAGCGTAAGAAGATAGAA         |
| 27[144] | 25[143] | CACAGACATGAAAAATCTAAAGCAAATCAATA         |
| 27[176] | 25[175] | TTAATGCGGCAACAGTGCCACGCTTTGAAAGG         |
| 28[63]  | 30[64]  | CAGTGAGATGGTGGTCCGAAATCAACGTCAA          |
| 28[95]  | 30[96]  | GTATTGGGAATCAAAAGAATAGCCACAAGAGT         |
| 28[127] | 27[111] | CCCTTCTGAACGCGCGGGGAGAGGCATTAATG         |
| 28[159] | 30[160] | TAAAAGGGCAAATATCGGCCTTGGTCTGTCC          |
| 29[80]  | 27[79]  | CCCTTATACGCCAGGGTGGTTTTTCTTCCAG          |
| 29[112] | 30[128] | GGTTGAGTGAATAACATCACTTGAATACTTC          |
| 29[144] | 27[143] | GAAGAACTACATTCTGGCCAACAGATACGTGG         |
| 29[176] | 27[175] | ATCCAGAAATTCACCAGTCACACGATTAGTCT         |
| 30[31]  | 31[39]  | CACTACGTGAGGTGCCGTAAAGCA                 |
| 30[63]  | 31[71]  | AGGGCGAAAAGGGAGCCCCGATT                  |
| 30[95]  | 31[103] | CCACTATTAAGCCGGCGAACGTGG                 |
| 30[127] | 29[111] | TTTGATTAGTTGTTCCAGTTTGGACGAGATAG         |
| 30[159] | 31[167] | ATCACGCATTGACGAGCACGTATA                 |
| 30[191] | 31[199] | TCAGTGAGAGAATCAGAGCGGGAG                 |
| 31[72]  | 29[79]  | TAGAGCTTGACGGGGAAAAGAACGTGGACTCCGGCAAAAT |
| 31[104] | 31[135] | CGAGAAAGGAAGGGGAATGCGCCGCTACAGGGC        |
| 31[136] | 29[143] | GCGTACTATGTTGCTAATTAACCGTTGTAGCCCTGAGTA  |
| 31[168] | 29[175] | ACGTGCTTTCCTCGTTGCCACCGAGTAAAAGACTGGTAAT |

---

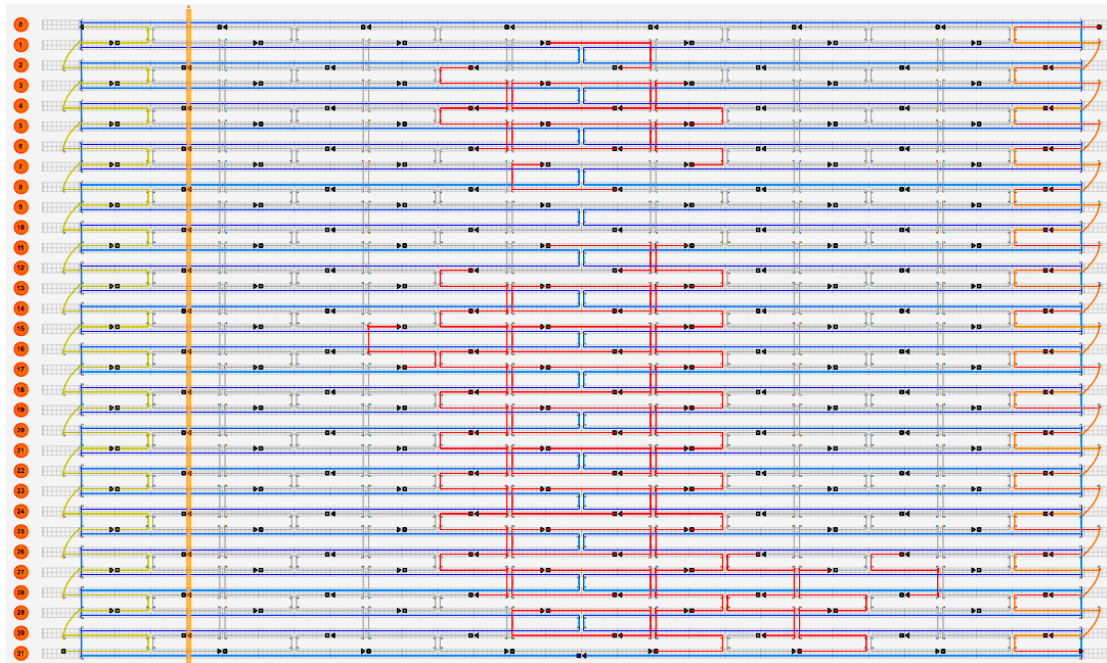

i

|         |         |                                  |
|---------|---------|----------------------------------|
| 1[112]  | 2[128]  | TTTGTCTGATACAGGAGTGTACTATACATGG  |
| 2[95]   | 4[96]   | TTTCTGTAGTGAATTTCTTAACAACAACCAT  |
| 3[112]  | 4[128]  | CCGATAGTCTCCCTCAGAGCCGCCACCACC   |
| 4[95]   | 6[96]   | CGCCCACGCGGGTAAAATACGTAAGAGGCAAA |
| 4[127]  | 3[111]  | GGAACCGCTGCGCCGACAATGACAGCTTGATA |
| 5[112]  | 6[128]  | CGAAGGCAGCCAGCAAAATCACCACCATTGG  |
| 5[144]  | 3[143]  | ATTACCATATCACCGGAACCAGAGACCCTCAG |
| 6[127]  | 5[111]  | GAATTAGACCAACCTAAAACGAAATGCCACTA |
| 7[144]  | 5[143]  | GCAACATACCGTCCCGACTTGAGGTAGCACC  |
| 8[127]  | 7[111]  | TAGCAAAGTACAGACCAGGCGGAGGACAG    |
| 11[112] | 12[128] | CTTTTGAATCCTGAATCTTACCAACCCAGCT  |
| 12[95]  | 14[96]  | ATAGTAAAAAAGATTAAGAGGAACGAGCTTC  |
| 13[112] | 14[128] | GACTTCAACAAGAACGGGTATTAATCTTTCCT |
| 13[144] | 11[143] | CCGCACTCTTAGTTGCTATTTGCACGCTAAC  |
| 14[95]  | 16[96]  | AAAGCGAAAGTTTCATTCCATATATTTAGTTT |
| 14[127] | 13[111] | TATCATTATATCGCGTTTTAATTGCCCGAAA  |
| 15[112] | 16[128] | TTCCCAATATTTAGGCAGAGGCATACAACGCC |
| 15[144] | 13[143] | CAGTAATAAATCAATAATCGGCTGACCAAGTA |
| 16[95]  | 18[96]  | GACCATTAAGCATAAAGCTAAATCCTTTTGCG |
| 16[127] | 15[111] | AACATGTATCTGCGAACGAGTAGAACAGTTGA |
| 17[80]  | 15[79]  | AGCCTCAGGATACATTTTCGAAATAAGTACGG |
| 17[112] | 18[128] | CAAAAACACAAATATATTTTAGTTCGCGAGAA |
| 17[144] | 15[143] | CTTCTGACAGAATCGCCATATTTATTTGAGC  |
| 18[95]  | 20[96]  | GGAGAAGCCCGGAGAGGGTAGCTATTGCCTGA |
| 18[127] | 17[111] | AACTTTTTTTATGACCCTGTAATAGGTTGTAC |
| 19[112] | 20[128] | AGATCTACCTTGCTTCTGTAATATATGTGA   |
| 19[144] | 17[143] | TTAATTAATCGCAAGACAAAGAAAATTCAT   |

|         |         |                                          |
|---------|---------|------------------------------------------|
| 20[95]  | 22[96]  | GAGTCTGGTTAAATCAGCTCATTTTCGCGTCTG        |
| 20[127] | 19[111] | GTGAATAAAAAGGCTATCAGGTCATTTTGAG          |
| 21[112] | 22[128] | ATAGGAACAACAGTACCTTTTACACAGATGAA         |
| 21[144] | 19[143] | AACAATAACAGTACATAAATCAATCGTCGCTA         |
| 22[95]  | 24[96]  | GCCTTCCTGGCCTCAGGAAGATCGTGCCGGAA         |
| 22[127] | 21[111] | TATACAGTGCCATCAAAAATAATTTTAAACCA         |
| 23[112] | 24[128] | CCAGCTTTACATTATCATTTTTCGCTTAAAAG         |
| 23[144] | 21[143] | AAACCACCTTTTCAGGTTAACGTTCCGGGAGA         |
| 24[95]  | 26[96]  | ACCAGGCAGTGCCAAGCTTGCATGCCGAGCTC         |
| 24[127] | 23[111] | TTTGAGTACCGGCACCGCTTCTGGCACTCCAG         |
| 25[112] | 26[128] | TCGACTCTCAAATATCAAACCCTCTCACCTTG         |
| 25[144] | 23[143] | TCTGGTCACCCGAACGTTATTAATGAACAAAG         |
| 26[95]  | 28[96]  | GAATTCGTCTGTGCGCCAGCTGCGGTTTGC           |
| 26[127] | 25[111] | CTGAACCTAGAGGATCCCCGGGTACCTGCAGG         |
| 26[159] | 28[160] | GCAGCAAATATTTTGAATGGCTACCAGTAA           |
| 26[191] | 28[192] | CACCGCCTCGAACTGATAGCCCTATTATTAC          |
| 27[112] | 28[128] | AATCGGCCACCTGAAAGCGTAAGAAGATAGAA         |
| 27[144] | 25[143] | CACAGACATGAAAAATCTAAAGCAAATCAATA         |
| 28[127] | 27[111] | CCCTTCTGAACGCGCGGGGAGAGGCATTAATG         |
| 28[159] | 30[160] | TAAAAGGGCAAACCTATCGGCCTTGGTCTGTCC        |
| 29[112] | 30[128] | GGTTGAGTGAATAACATCACTTGAATACTTC          |
| 29[144] | 27[143] | GAAGAACTACATTCTGGCCAACAGATACGTGG         |
| 29[176] | 27[175] | ATCCAGAAATTCACCAGTCACACGATTAGTCT         |
| 30[127] | 29[111] | TTTGATTAGTTGTTCCAGTTTGGACGAGATAG         |
| 31[136] | 29[143] | GCGTACTATGGTTGCTAATTAACCGTTGTAGCCCTGAGTA |
| 31[168] | 29[175] | ACGTGCTTTCCTCGTTGCCACCGAGTAAAAGACTGGTAAT |

i background

|        |        |                                           |
|--------|--------|-------------------------------------------|
| 0[39]  | 2[32]  | CACCACCCTCATTTTCCGTAACACTGAGTTTCAAAGGAAC  |
| 0[71]  | 2[64]  | ACCGCCACCCTCAGAAACAACGCCTGTAGCATAACTTTCA  |
| 0[103] | 2[96]  | TACTCAGGAGGTTTATAGATGTTAGCGTAACGAAAATGAAT |
| 0[135] | 0[104] | TATAAGTATAGCCCAGGAAATAGGTGTATCACCG        |
| 0[167] | 2[160] | ACCAGGCGGATAAGTGGGGGTCAGTGCCTTGACAGTCTCT  |
| 0[199] | 2[192] | GAAGGATTAGGATTAGAAACAGTTAATGCCCCATAAATCC  |
| 1[48]  | 0[40]  | TACAAACTCCGCCACCCTCAGAGC                  |
| 1[80]  | 0[72]  | CAGCCCTCTACCGCCACCCTCAGA                  |
| 1[144] | 0[136] | GTTTTAACCCGTCGAGAGGGTTGA                  |
| 1[176] | 0[168] | GCCCGTATCGGGGTTTTGCTCAGT                  |
| 1[208] | 0[200] | TTCGGAACCTGAGACTCCTCAAGA                  |
| 2[31]  | 4[32]  | AACTAAAGATCTCCAAAAAAGGCTTTTTCGCG          |
| 2[63]  | 4[64]  | ACAGTTTCTAATTGTATCGGTTTAGGTCGCTG          |
| 2[127] | 1[111] | CTTTTGATCTTTCCAGACGTTAGTTCTAAAGT          |
| 2[159] | 4[160] | GAATTTACCCCTCAGAGCCACCCTCTTTTCA           |
| 2[191] | 4[192] | TCATTAAGAACCACCACCAGAGTTCGGTCA            |
| 3[48]  | 1[47]  | GGAGCCTTAGCGGAGTGAGAATAGGTCACCAG          |
| 3[80]  | 1[79]  | CTTTCGAGTGGGATTTTCTAAACTCCACAGA           |

|         |         |                                    |
|---------|---------|------------------------------------|
| 3[144]  | 1[143]  | AACCGCCACGTTCCAGTAAGCGTCGGTAATAA   |
| 3[176]  | 1[175]  | CCGCCACCGCCAGAATGGAAAGCGGTAACAGT   |
| 3[208]  | 1[207]  | AGCATTGATGATATTCACAAACAACACTGCCTAT |
| 4[31]   | 6[32]   | GGATCGTCGGGTAGCAACGGCTACAAGTACAA   |
| 4[63]   | 6[64]   | AGGCTTGCAAAGACTTTTTTCATGATGACCCCC  |
| 4[159]  | 6[160]  | TAATCAAATAGCAAGGCCGAAACTAAAGGTG    |
| 4[191]  | 6[192]  | TAGCCCCCTCGATAGCAGCACCGTAGGGAAGG   |
| 5[48]   | 3[47]   | TGAGGACTAGGGAGTTAAAGGCCGCTCCAAAA   |
| 5[80]   | 3[79]   | CCATTAACATAACCGATATATTCTCAGCTTG    |
| 5[176]  | 3[175]  | TGAAACCATTATTAGCGTTTGCCACCTCAGAG   |
| 5[208]  | 3[207]  | GCGACAGACGTTTTTCATCGGCATTCCGCCGCC  |
| 6[31]   | 8[32]   | CGGAGATTCGCGACCTGCTCCATGACGTAACA   |
| 6[63]   | 8[64]   | AGCGATTAAGGCGCAGACGGTCAATGACAAGA   |
| 6[95]   | 8[96]   | AGAATACACTGACCAACTTTGAAAATAGGCTG   |
| 6[159]  | 8[160]  | AATTATCATAAAAGAAACGCAAGAAGAAGT     |
| 6[191]  | 8[192]  | TAAATATTTATTTTGTCACAATCCCGAGGAA    |
| 7[48]   | 5[47]   | CCGGAACGTACCAAGCGCGAAACAAGAGGCTT   |
| 7[80]   | 5[79]   | GAACCGAACTAAAACACTCATCTTGGAAGTTT   |
| 7[112]  | 8[128]  | ATGAACGGGTAGAAAATACATACACAGTATGT   |
| 7[176]  | 5[175]  | GAATAAGTGACGGAATTATTCATGTCACCAA    |
| 7[208]  | 5[207]  | ATTCATATTTCAACCGATTGAGGGAATCAGTA   |
| 8[31]   | 10[32]  | AAGCTGCTACACCAGAACGAGTAGATCAGTTG   |
| 8[63]   | 10[64]  | ACCGGATATGGTTTAATTTCAACTACGGAACA   |
| 8[95]   | 10[96]  | GCTGACCTACCTTATGCGATTTTAGGAAGAAA   |
| 8[159]  | 10[160] | GCATGATTTGAGTTAAGCCCAATAGACGGGAG   |
| 8[191]  | 10[192] | ACGCAATAATGAAATAGCAATAGCAGAGAATA   |
| 9[48]   | 7[47]   | GCTTGAGATTCATTACCCAAATCATTACTTAG   |
| 9[80]   | 7[79]   | TGTGAATTTTCATCAAGAGTAATCTTCATAAGG  |
| 9[112]  | 10[128] | CTCATTATGCGCTAATATCAGAGAGTCAGAGG   |
| 9[144]  | 7[143]  | ACAAGAATAAGACTCCTTATTACGTAAAGGTG   |
| 9[176]  | 7[175]  | AAGAAACAATAACGGAATACCCAAACACCACG   |
| 9[208]  | 7[207]  | CGAAGCCCAGTTACCAGAAGGAAAAATAGAAA   |
| 10[31]  | 12[32]  | AGATTTAGCGCCAAAAGGAATTACCATTGAAT   |
| 10[63]  | 12[64]  | ACATTATTAACACTATCATAACCCGCGTCCAA   |
| 10[95]  | 12[96]  | AATCTACGGATAAAAACAAAATAAGGGGGTA    |
| 10[127] | 9[111]  | GTAATTGAACCAGTCAGGACGTTGAGAACTGG   |
| 10[159] | 12[160] | AATTAACTTTCCAGAGCCTAATTTAAGCCTTA   |
| 10[191] | 12[192] | ACATAAAAACAGCCATATTATTTATTAGCGAA   |
| 11[48]  | 9[47]   | GTAAGAGCACAGGTAGAAAAGATTCTAAATTGG  |
| 11[80]  | 9[79]   | CAGACGACTTAATAAAACGAACTATTAATCAT   |
| 11[144] | 9[143]  | GAGCGTCTGAACACCCTGAACAAAGATAACCC   |
| 11[176] | 9[175]  | CAAAATAAACAGGGAAGCGCATTAAATAAGAGC  |
| 11[208] | 9[207]  | CAAATAAGATAGCAGCCTTTACAGTATCTTAC   |
| 12[31]  | 14[32]  | CCCCCTCACCATAAATCAAAAATCATTGCTCC   |
| 12[63]  | 14[64]  | TACTGCGGTATTATAGTCAGAAGCCTCCAACA   |
| 12[127] | 11[111] | ACAATTTTAAAGAAGTTTTGCCAGGCGAGAGG   |

|         |         |                                   |
|---------|---------|-----------------------------------|
| 12[159] | 14[160] | AATCAAGAATCGAGAACAAGCAAGCGAGCATG  |
| 12[191] | 14[192] | CCTCCCGACGTAGGAATCATTACCGAACAAAGA |
| 13[48]  | 11[47]  | ACCCTGACAATCGTCATAAAATATTGAGGCATA |
| 13[80]  | 11[79]  | TTGCATCAATGTTTAGACTGGATATCGTTTAC  |
| 13[176] | 11[175] | ATTTTCATCTTGCGGGAGGTTTTGGCCAGTTA  |
| 13[208] | 11[207] | TAGCAAGCAAGAACGCGAGGCGTTTTCCAATC  |
| 14[31]  | 16[32]  | TTTTGATAATTGCTGAATATAATGGGGGCGCG  |
| 14[63]  | 16[64]  | GGTCAGGATTTAAATATGCAACTAGGTCAATA  |
| 14[159] | 16[160] | TAGAAACCAGAGAATATAAAGTACCAGTAGGG  |
| 14[191] | 16[192] | AAAATAATAATTCTGTCCAGACGACAAATTCT  |
| 15[48]  | 13[47]  | CAACATGTTTAGAGAGTACCTTTAAGGTCTTT  |
| 15[80]  | 13[79]  | TGTCTGGACCAGACCGGAAGCAAAAAAGCGGA  |
| 15[176] | 13[175] | GGTAAAGTATCCCATCCTAATTTACCGTTTTT  |
| 15[208] | 13[207] | AACAACATACAATAGATAAGTCCTGCGCCCAA  |
| 16[31]  | 18[32]  | AGCTGAAATTAACATCCAATAAATAAATGCAA  |
| 16[63]  | 18[64]  | ACCTGTTTAGAATTAGCAAAATTAGGATAAAA  |
| 16[159] | 18[160] | CTTAATTGCTAAATTTAATGTTTTGCTGATG   |
| 16[191] | 18[192] | TACCAGTAGATAAATAAGGCGTTAGGCTTAGG  |
| 17[48]  | 15[47]  | CAAGGCAAAGCTATATTTTCATTTCTGTAGCT  |
| 17[176] | 15[175] | GACCGTGTTAAAGCCAACGCTCAACGACAAAA  |
| 17[208] | 15[207] | TAAACACCTATCATATGCGTTATACGACAATA  |
| 18[31]  | 20[32]  | TGCCTGAGAAGGCCGGAGACAGTCTCATATGT  |
| 18[63]  | 20[64]  | ATTTTTAGGATATTCAACCGTCTGATGAACG   |
| 18[159] | 20[160] | CAAATCCATTTTCCCTTAGAATCCCCTTTTTT  |
| 18[191] | 20[192] | TTGGGTTAAGCTTAGATTAAGACGATTAATTA  |
| 19[48]  | 17[47]  | ATCAATATAACCCTCATATATTTTCATACAGG  |
| 19[80]  | 17[79]  | AATTAATGCTTTATTTCAACGCAAAGCAATAA  |
| 19[176] | 17[175] | ATAGCGATTATAACTATATGTAAAGAAATACC  |
| 19[208] | 17[207] | AGTCAATATACCTTTTTAACCTCCAATAAGAA  |
| 20[31]  | 22[32]  | ACCCCGGTTTGTATAAGCAAATATGATTCTCC  |
| 20[63]  | 22[64]  | GTAATCGTAATATTTTGTTAAAATAACATTAA  |
| 20[159] | 22[160] | AATGGAAACGGATTCGCCTGATTGAAAGAAAT  |
| 20[191] | 22[192] | CATTTAACACAAAATCGCGCAGAGATATCAA   |
| 21[48]  | 19[47]  | TAAACGTAAAACACTAGCATGTCAAAAATCACC |
| 21[80]  | 19[79]  | AATTTTTGAGCAAACAAGAGAATCAGCTGATA  |
| 21[176] | 19[175] | ACCAAGTTAATTTCAATTTGAATTATTGAAAAC |
| 21[208] | 19[207] | TTCATTTACATCAAGAAAACAAACCTGAGAAG  |
| 22[31]  | 24[32]  | GTGGGAACCGTTGGTGTAGATGGGGTGCGGGC  |
| 22[63]  | 24[64]  | ATGTGAGCATCTGCCAGTTTGAGGTCAGGCTG  |
| 22[159] | 24[160] | TGCGTAGAAGAAGGAGCGGAATTACGTATTA   |
| 22[191] | 24[192] | ATTATTTGTATCAGATGATGGCAAAAGTATTA  |
| 23[48]  | 21[47]  | AACCGTGCGAGTAACAACCCGTCGTAAATTG   |
| 23[80]  | 21[79]  | ACAGTATCGTAGCCAGCTTTCATCTCGCATT   |
| 23[176] | 21[175] | TTCCTGATCACGTAAAACAGAAATCTTTGAAT  |
| 23[208] | 21[207] | TATAATCCAGGGTTAGAACCTACCGCGAATTA  |
| 24[31]  | 26[32]  | CTCTTCGCGCAAGGCGATTAAGTTTTCCACAC  |

|         |         |                                          |
|---------|---------|------------------------------------------|
| 24[63]  | 26[64]  | CGCAACTGTTCCAGTCACGACGTGTTTCCTG          |
| 24[159] | 26[160] | ATCCTTTGGTTGGCAAATCAACAGGAGAGCCA         |
| 24[191] | 26[192] | GACTTTACAAGGTTATCTAAAATAAGTATTAA         |
| 25[48]  | 23[47]  | CCAGGGTTTTGGGAAGGGCGATCGCGCATCGT         |
| 25[80]  | 23[79]  | GACGGCCAAAGCGCCATTTCGCCATGGACGACG        |
| 25[176] | 23[175] | AATTGAGGAAACAATTCGACAACTTCATCATA         |
| 25[208] | 23[207] | AGCACTAAACATTTGAGGATTTAGTTCATCAA         |
| 26[31]  | 28[32]  | AACATACGCCTAATGAGTGAGCTAGCCCTTCA         |
| 26[63]  | 28[64]  | TGTGAAATTTGCGCTCACTGCCCGTTTTTAC          |
| 27[48]  | 25[47]  | TAATTGCGTGTTATCCGCTCACAAGGGTAACG         |
| 27[80]  | 25[79]  | TCGGGAAAAATCATGGTCATAGCTTGTAAAAC         |
| 27[176] | 25[175] | TTAATGCGGCAACAGTGCCACGCTTTGAAAGG         |
| 27[208] | 25[207] | CCATTAACAGAGGTGAGGCGGTCTCTTAGG           |
| 28[31]  | 30[32]  | CCGCCTGGGGTTTGGCCAGCAGGGCGATGGCC         |
| 28[63]  | 30[64]  | CAGTGAGATGGTGGTCCGAAATCAACGTCAA          |
| 28[95]  | 30[96]  | GTATTGGGAATCAAAGAATAGCCACAAGAGT          |
| 28[191] | 30[192] | ATTGGCAGCAATATTACCGCCAGCTTTTATAA         |
| 29[48]  | 27[47]  | CTGTTTGACGGGCAACAGCTGATTACTCACAT         |
| 29[80]  | 27[79]  | CCCTTATACGCCAGGGTGGTTTTTCTTTCCAG         |
| 29[208] | 27[207] | CAGGAAAAAATCGTCTGAAATGGAAAACATCG         |
| 30[31]  | 31[39]  | CACTACGTGAGGTGCCGTAAAGCA                 |
| 30[63]  | 31[71]  | AGGGCGAAAAGGGAGCCCCCGATT                 |
| 30[95]  | 31[103] | CCACTATTAAGCCGGCGAACGTGG                 |
| 30[159] | 31[167] | ATCACGCATTGACGAGCACGTATA                 |
| 30[191] | 31[199] | TCAGTGAGAGAATCAGAGCGGGAG                 |
| 31[40]  | 29[47]  | CTAAATCGGAACCCTAAAACCGTCTATCAGGGCGAAAATC |
| 31[72]  | 29[79]  | TAGAGCTTGACGGGGAAAAGAACGTGGACTCCGGCAAAAT |
| 31[104] | 31[135] | CGAGAAAGGAAGGGAATGCGCCGCTACAGGGC         |
| 31[200] | 29[207] | CTAAACAGGAGGCCGAGAATCCTGAGAAGTGCATTGCAA  |

---



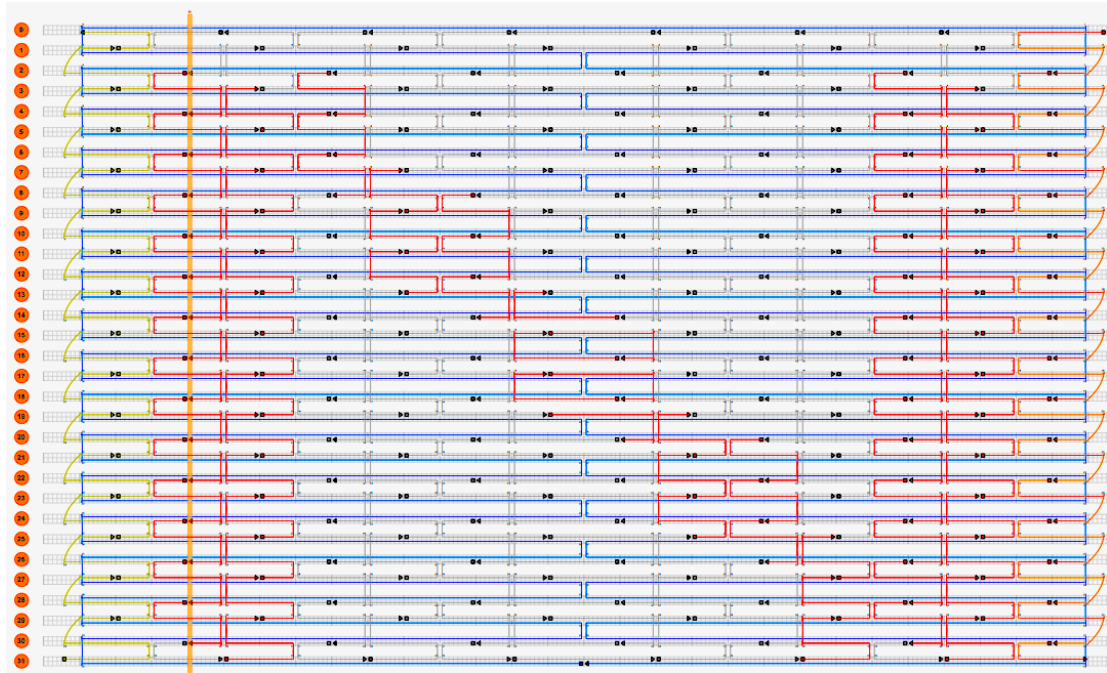

N

|         |         |                                   |
|---------|---------|-----------------------------------|
| 2[31]   | 4[32]   | AACTAAAGATCTCCAAAAAAGGCTTTTGCG    |
| 2[63]   | 4[64]   | ACAGTTTCTAATTGTATCGGTTTAGGTCGCTG  |
| 2[191]  | 4[192]  | TCATTAAGAACCACCACCAGAGTTCGGTCA    |
| 4[31]   | 6[32]   | GGATCGTCGGGTAGCAACGGCTACAAGTACAA  |
| 4[63]   | 6[64]   | AGGCTTGCAAAGACTTTTTTCATGATGACCCCC |
| 4[191]  | 6[192]  | TAGCCCCCTCGATAGCAGCACCGTAGGGAAGG  |
| 5[48]   | 3[47]   | TGAGGACTAGGGAGTTAAAGGCCGCTCCAAAA  |
| 5[208]  | 3[207]  | GCGACAGACGTTTTTCATCGGCATTCCGCCGCC |
| 6[31]   | 8[32]   | CGGAGATTCGCGACCTGCTCCATGACGTAACA  |
| 6[63]   | 8[64]   | AGCGATTAAGGCGCAGACGGTCAATGACAAGA  |
| 6[191]  | 8[192]  | TAAATATTTATTTTGTACAAATCCCGAGGAA   |
| 7[48]   | 5[47]   | CCGGAACGTACCAAGCGGAAACAAGAGGCTT   |
| 7[208]  | 5[207]  | ATTCATATTTCAACCGATTGAGGGAATCAGTA  |
| 8[31]   | 10[32]  | AAGCTGCTACACCAGAACGAGTAGATCAGTTG  |
| 8[95]   | 10[96]  | GCTGACCTACCTTATGCGATTTTAGGAAGAAA  |
| 8[191]  | 10[192] | ACGCAATAATGAAATAGCAATAGCAGAGAATA  |
| 9[48]   | 7[47]   | GCTTGAGATTCATTACCCAAATCATTACTTAG  |
| 9[80]   | 7[79]   | TGTGAATTTTCATCAAGAGTAATCTTCATAAGG |
| 9[208]  | 7[207]  | CGAAGCCAGTTACCAGAAGGAAAAATAGAAA   |
| 10[31]  | 12[32]  | AGATTTAGCGCCAAAAGGAATTACCATTGAAT  |
| 10[95]  | 12[96]  | AATCTACGGATAAAAACCAAATAAGGGGGTA   |
| 10[191] | 12[192] | ACATAAAAACAGCCATATTATTTATTAGCGAA  |
| 11[48]  | 9[47]   | GTAAGAGCACAGGTAGAAAGATTCTAAATTGG  |
| 11[80]  | 9[79]   | CAGACGACTTAATAAAACGAACTATTAATCAT  |
| 11[208] | 9[207]  | CAAATAAGATAGCAGCCTTACAGTATCTTAC   |
| 12[31]  | 14[32]  | CCCCCTACCATAAATCAAAAATCATTGCTCC   |
| 12[95]  | 14[96]  | ATAGTAAAAAAGATTAAGAGGAACGAGCTTC   |

|         |         |                                   |
|---------|---------|-----------------------------------|
| 12[191] | 14[192] | CCTCCCGACGTAGGAATCATTACCGAACAAAGA |
| 13[48]  | 11[47]  | ACCCTGACAATCGTCATAAATATTGAGGCATA  |
| 13[80]  | 11[79]  | TTGCATCAATGTTTAGACTGGATATCGTTTAC  |
| 13[208] | 11[207] | TAGCAAGCAAGAACGCGAGGCGTTTCCCAATC  |
| 14[31]  | 16[32]  | TTTTGATAATTGCTGAATATAATGGGGGCGCG  |
| 14[127] | 13[111] | TATCATTTCATATCGCGTTTTAATTGCCCGAAA |
| 14[191] | 16[192] | AAAATAATAATTCTGTCCAGACGACAAATTCT  |
| 15[48]  | 13[47]  | CAACATGTTTAGAGAGTACCTTTAAGGTCTTT  |
| 15[112] | 16[128] | TTCCAATATTTAGGCAGAGGCATACAACGCC   |
| 15[208] | 13[207] | AACAACATACAATAGATAAGTCCTGCGCCCAA  |
| 16[31]  | 18[32]  | AGCTGAAATTAACATCCAATAAATAAATGCAA  |
| 16[127] | 15[111] | AACATGTATCTGCGAACGAGTAGAACAGTTGA  |
| 16[191] | 18[192] | TACCAGTAGATAAATAAGGCGTTAGGCTTAGG  |
| 17[48]  | 15[47]  | CAAGGCAAAGCTATATTTTCATTCTGTAGCT   |
| 17[112] | 18[128] | CAAAAACACAAATATATTTTAGTTCGCGAGAA  |
| 17[208] | 15[207] | TAAACACCTATCATATGCGTTATACGACAATA  |
| 18[31]  | 20[32]  | TGCCTGAGAAGGCCGAGACAGTCTCATATGT   |
| 18[127] | 17[111] | AACTTTTTTATGACCCTGTAATAGGTTGTAC   |
| 18[191] | 20[192] | TTGGGTTAAGCTTAGATTAAGACGATTAATTA  |
| 19[48]  | 17[47]  | ATCAATATAACCCTCATATATTTTCATACAGG  |
| 19[112] | 20[128] | AGATCTACCCTTGCTTCTGTAAATATATGTGA  |
| 19[208] | 17[207] | AGTCAATATACCTTTTTAACCTCCAATAAGAA  |
| 20[31]  | 22[32]  | ACCCCGGTTTGTATAAGCAAATATGATTCTCC  |
| 20[159] | 22[160] | AATGGAAACGGATTCGCCTGATTGAAAGAAAT  |
| 20[191] | 22[192] | CATTTAACACAAAATCGCGCAGAGATATCAAA  |
| 21[48]  | 19[47]  | TAAACGTAAAACTAGCATGTCAAAAATCACC   |
| 21[144] | 19[143] | AACAATAACAGTACATAAATCAATCGTCGCTA  |
| 21[208] | 19[207] | TTCATTTACATCAAGAAAAAACTGAGAAG     |
| 22[31]  | 24[32]  | GTGGGAACCGTTGGTGTAGATGGGGTGCGGGC  |
| 22[159] | 24[160] | TGCGTAGAAGAAGGAGCGGAATTACGTATTAA  |
| 22[191] | 24[192] | ATTATTTGTATCAGATGATGGCAAAAGTATTA  |
| 23[48]  | 21[47]  | AACCGTGCAGTAACAACCCGTCGTTAAATTG   |
| 23[144] | 21[143] | AAACCACCTTTTCAGGTTAACGTTGCGGAGAG  |
| 23[208] | 21[207] | TATAATCCAGGGTTAGAACCTACCGGAATTA   |
| 24[31]  | 26[32]  | CTCTTCGCGCAAGGCGATTAAGTTTTCCACAC  |
| 24[159] | 26[160] | ATCCTTTGGTTGGCAAATCAACAGGAGAGCCA  |
| 24[191] | 26[192] | GACTTTACAAGGTTATCTAAAATAAGTATTAA  |
| 25[48]  | 23[47]  | CCAGGGTTTTGGGAAGGCGATCGCGCATCGT   |
| 25[144] | 23[143] | TCTGGTCACCCGAACGTTATTAATGAACAAAG  |
| 25[208] | 23[207] | AGCACTAAACATTTGAGGATTTAGTTCATCAA  |
| 26[31]  | 28[32]  | AACATACGCCTAATGAGTGAGCTAGCCCTTCA  |
| 26[191] | 28[192] | CACCGCCTCGAACTGATAGCCCTATTATTAC   |
| 27[48]  | 25[47]  | TAATTGCGTGTTATCCGCTCACAAGGGTAACG  |
| 27[176] | 25[175] | TTAATGCGGCAACAGTGCCACGCTTTGAAAGG  |
| 27[208] | 25[207] | CCATTAACAGAGGTGAGGCGGTCTCTTAGG    |
| 28[31]  | 30[32]  | CCGCTGGGGTTTGGCCAGCAGGCGATGGCC    |

|         |         |                                          |
|---------|---------|------------------------------------------|
| 28[191] | 30[192] | ATTGGCAGCAATATTACCGCCAGCTTTTATAA         |
| 29[48]  | 27[47]  | CTGTTTGACGGGCAACAGCTGATTACTCACAT         |
| 29[176] | 27[175] | ATCCAGAAATTCACCAGTCACACGATTAGTCT         |
| 29[208] | 27[207] | CAGGAAAAAATCGTCTGAAATGGAAAACATCG         |
| 31[40]  | 29[47]  | CTAAATCGGAACCTAAAACCGTCTATCAGGGCGAAAATC  |
| 31[168] | 29[175] | ACGTGCTTTCCTCGTTGCCACCGAGTAAAAGACTGGTAAT |
| 31[200] | 29[207] | CTAAACAGGAGGCCGAGAATCCTGAGAAGTGTCAATGCAA |

N background

|        |        |                                           |
|--------|--------|-------------------------------------------|
| 0[39]  | 2[32]  | CACCACCCTCATTTTTCCGTAACACTGAGTTTCAAAGGAAC |
| 0[71]  | 2[64]  | ACCGCCACCCTCAGAAACAACGCCTGTAGCATAACTTTCA  |
| 0[103] | 2[96]  | TACTCAGGAGGTTTAGATAGTTAGCGTAACGAAAATGAAT  |
| 0[135] | 0[104] | TATAAGTATAGCCCGGAATAGGTGTATCACCG          |
| 0[167] | 2[160] | ACCAGGCGGATAAGTGGGGGTGAGTGCCTTGACAGTCTCT  |
| 0[199] | 2[192] | GAAGGATTAGGATTAGAAAACAGTTAATGCCCCATAAATCC |
| 1[48]  | 0[40]  | TACAAACTCCGCCACCCTCAGAGC                  |
| 1[80]  | 0[72]  | CAGCCCTCTACCGCCACCCTCAGA                  |
| 1[112] | 2[128] | TTTGTCGTGATACAGGAGTGTACTATACATGG          |
| 1[144] | 0[136] | GTTTTAACCCGTGAGAGGGTTGA                   |
| 1[176] | 0[168] | GCCCGTATCGGGTTTTGCTCAGT                   |
| 1[208] | 0[200] | TTCGGAACCTGAGACTCCTCAAGA                  |
| 2[95]  | 4[96]  | TTTCTGTAGTGAATTTCTTAAACAACAACCAT          |
| 2[127] | 1[111] | CTTTTGATCTTCCAGACGTTAGTTCTAAAGT           |
| 2[159] | 4[160] | GAATTTACCCCTCAGAGCCACCCTCTTTTCA           |
| 3[48]  | 1[47]  | GGAGCCTTAGCGGAGTGAGAATAGGTCACCAG          |
| 3[80]  | 1[79]  | CTTTCGAGTGGGATTTTGCTAAACTCCACAGA          |
| 3[112] | 4[128] | CCGATAGTCTCCCTCAGAGCCGCCACCACC            |
| 3[144] | 1[143] | AACCGCCACGTTCCAGTAAGCGTCGGTAATAA          |
| 3[176] | 1[175] | CCGCCACCGCCAGAATGGAAAGCGGTAACAGT          |
| 3[208] | 1[207] | AGCATTGATGATATTCACAAACAATGCCTAT           |
| 4[95]  | 6[96]  | CGCCCACGCGGGTAAAATACGTAAGAGGCCAAA         |
| 4[127] | 3[111] | GGAACCGCTGCGCCGACAATGACAGCTTGATA          |
| 4[159] | 6[160] | TAATCAAATAGCAAGGCCGAAACTAAAGGTG           |
| 5[80]  | 3[79]  | CCATTAACATAACCGATATATTCTCAGCTTG           |
| 5[112] | 6[128] | CGAAGGCAGCCAGCAAATCACCACCATTGG            |
| 5[144] | 3[143] | ATTACCATATCACCGGAACCAGAGACCCTCAG          |
| 5[176] | 3[175] | TGAAACCATTATTAGCGTTTGCCACCTCAGAG          |
| 6[95]  | 8[96]  | AGAATACTGACCAACTTTGAAAATAGGCTG            |
| 6[127] | 5[111] | GAATTAGACCAACCTAAAACGAAATGCCACTA          |
| 6[159] | 8[160] | AATTATCATAAAAGAAACGCAAAGAAGAACTG          |
| 7[80]  | 5[79]  | GAACCGAACTAAAACACTCATCTTGGAAAGTTT         |
| 7[112] | 8[128] | ATGAACGGGTAGAAAATACATACAGTATGT            |
| 7[144] | 5[143] | GCAACATACCGTCACCGACTTGAGGTAGCACC          |
| 7[176] | 5[175] | GAATAAGTGACGGAAATTTATTCATGTCACCAA         |
| 8[63]  | 10[64] | ACCGGATATGGTTTAATTTCAACTACGGAACA          |
| 8[127] | 7[111] | TAGCAAAGTGTACAGACCAGGCGGAGGACAG           |

|         |         |                                   |
|---------|---------|-----------------------------------|
| 8[159]  | 10[160] | GCATGATTTGAGTTAAGCCCAATAGACGGGAG  |
| 9[112]  | 10[128] | CTCATTATGCGCTAATATCAGAGAGTCAGAGG  |
| 9[144]  | 7[143]  | ACAAGAATAAGACTCCTTATTACGTAAGGTG   |
| 9[176]  | 7[175]  | AAGAAACAATAACGGAATACCCAAACACCACG  |
| 10[63]  | 12[64]  | ACATTATTAACACTATCATAACCCGCGTCCAA  |
| 10[127] | 9[111]  | GTAATTGAACCAGTCAGGACGTTGAGAACTGG  |
| 10[159] | 12[160] | AATTAACTTTCCAGAGCCTAATTTAAGCCTTA  |
| 11[112] | 12[128] | CTTTTGCAATCCTGAATCTTACCAACCCAGCT  |
| 11[144] | 9[143]  | GAGCGTCTGAACACCCTGAACAAAGATAACCC  |
| 11[176] | 9[175]  | CAAAATAAACAGGGAAGCGCATTAAATAAGAGC |
| 12[63]  | 14[64]  | TACTGCGGTATTATAGTCAGAAGCCTCCAACA  |
| 12[127] | 11[111] | ACAATTTTAAAGAAGTTTTGCCAGGCGAGAGG  |
| 12[159] | 14[160] | AATCAAGAATCGAGAACAAGCAAGCGAGCATG  |
| 13[112] | 14[128] | GACTTCAACAAGAACGGGTATTAATCTTTCCT  |
| 13[144] | 11[143] | CCGCACTCTAGTTGCTATTTTGCACGCTAAC   |
| 13[176] | 11[175] | ATTTTCATCTTGCGGGAGGTTTTGGCCAGTTA  |
| 14[63]  | 16[64]  | GGTCAGGATTTAAATATGCAACTAGGTCAATA  |
| 14[95]  | 16[96]  | AAAGCGAAAGTTTCATTCCATATATTTAGTTT  |
| 14[159] | 16[160] | TAGAAACCAGAGAATATAAAGTACCAGTAGGG  |
| 15[80]  | 13[79]  | TGTCTGGACCAGACCGGAAGCAAAAAGCGGA   |
| 15[144] | 13[143] | CAGTAATAAATCAATAATCGGCTGACCAAGTA  |
| 15[176] | 13[175] | GGTAAAGTATCCCATCCTAATTTACCGTTTTT  |
| 16[63]  | 18[64]  | ACCTGTTTAGAATTAGCAAAATTAGGATAAAA  |
| 16[95]  | 18[96]  | GACCATTAAGCATAAAGCTAAATCCTTTTGCG  |
| 16[159] | 18[160] | CTTAATTGCTAAATTTAATGGTTTTGCTGATG  |
| 17[80]  | 15[79]  | AGCCTCAGGATACATTTCGCAAATAAGTACGG  |
| 17[144] | 15[143] | CTTCTGACAGAATCGCCATATTTATTTGAGC   |
| 17[176] | 15[175] | GACCGTGTTAAAGCCAACGCTCAACGACAAAA  |
| 18[63]  | 20[64]  | ATTTTTAGGATATTCAACCGTTCTGATGAACG  |
| 18[95]  | 20[96]  | GGAGAAGCCCGGAGAGGGTAGCTATTGCCTGA  |
| 18[159] | 20[160] | CAAATCCATTTTCCTTAGAATCCCCTTTTTT   |
| 19[80]  | 17[79]  | AATTAATGCTTTATTTCAACGCAAAGCAATAA  |
| 19[144] | 17[143] | TTAATTAATCGCAAGACAAAGAAAATTTTCAT  |
| 19[176] | 17[175] | ATAGCGATTATAACTATATGTAAAGAAATACC  |
| 20[63]  | 22[64]  | GTAATCGTAATATTTTGTTAAAATAACATTAA  |
| 20[95]  | 22[96]  | GAGTCTGGTTAAATCAGCTCATTTGCGTCTG   |
| 20[127] | 19[111] | GTGAATAAAAAGGCTATCAGGTCAATTTTGAG  |
| 21[80]  | 19[79]  | AATTTTTGAGCAAACAAGAGAATCAGCTGATA  |
| 21[112] | 22[128] | ATAGGAACAACAGTACCTTTTACACAGATGAA  |
| 21[176] | 19[175] | ACCAAGTTAATTTCAATTTGAATTATTGAAAAC |
| 22[63]  | 24[64]  | ATGTGAGCATCTGCCAGTTTGAGGTCAGGCTG  |
| 22[95]  | 24[96]  | GCCTTCCTGGCCTCAGGAAGATCGTGCCGGAA  |
| 22[127] | 21[111] | TATACAGTGCCATCAAAAATAATTTTAAACCA  |
| 23[80]  | 21[79]  | ACAGTATCGTAGCCAGCTTTTCATCTCGCATT  |
| 23[112] | 24[128] | CCAGCTTTACATTATCATTTTGCGTTTAAAAG  |
| 23[176] | 21[175] | TTCCTGATCACGTAAAACAGAAATCTTTGAAT  |

|         |         |                                          |
|---------|---------|------------------------------------------|
| 24[63]  | 26[64]  | CGCAACTGTTCCAGTCACGACGTGTTTCCTG          |
| 24[95]  | 26[96]  | ACCAGGCAGTGCCAAGCTTGCATGCCGAGCTC         |
| 24[127] | 23[111] | TTTGAGTACCGGCACCGCTTCTGGCACTCCAG         |
| 25[80]  | 23[79]  | GACGGCCAAAGCGCCATTGCCCATGGACGACG         |
| 25[112] | 26[128] | TCGACTCTCAAATATCAAACCCTCTCACCTTG         |
| 25[176] | 23[175] | AATTGAGGAAACAATTCGACAACTTCATCATA         |
| 26[63]  | 28[64]  | TGTGAAATTTGCGCTCACTGCCCGCTTTTAC          |
| 26[95]  | 28[96]  | GAATTCGCCTGTGCGTCCAGCTGCGGTTTGC          |
| 26[127] | 25[111] | CTGAACCTAGAGGATCCCCGGGTACCTGCAGG         |
| 26[159] | 28[160] | GCAAGCAAAATATTTTGAATGGCTACCAGTAA         |
| 27[80]  | 25[79]  | TCGGGAAAAATCATGGTCATAGCTTGTAAAC          |
| 27[112] | 28[128] | AATCGGCCACCTGAAAGCGTAAGAAGATAGAA         |
| 27[144] | 25[143] | CACAGACATGAAAAATCTAAAGCAAATCAATA         |
| 28[63]  | 30[64]  | CAGTGAGATGGTGGTCCGAAATCAACGTCAA          |
| 28[95]  | 30[96]  | GTATTGGGAATCAAAAGAATAGCCACAAGAGT         |
| 28[127] | 27[111] | CCCTTCTGAACGCGCGGGGAGAGGCATTAATG         |
| 28[159] | 30[160] | TAAAAGGGCAAATATCGGCCTGGTCTGTCC           |
| 29[80]  | 27[79]  | CCCTTATACGCCAGGGTGGTTTTTCTTTCCAG         |
| 29[112] | 30[128] | GGTTGAGTGAATAACATCACTTGAATACTTC          |
| 29[144] | 27[143] | GAAGAACTACATTCTGGCCAACAGATACGTGG         |
| 30[31]  | 31[39]  | CACTACGTGAGGTGCCGTAAAGCA                 |
| 30[63]  | 31[71]  | AGGGCGAAAAGGGAGCCCCGATT                  |
| 30[95]  | 31[103] | CCACTATTAAGCCGGCGAACGTGG                 |
| 30[127] | 29[111] | TTTGATTAGTTGTTCCAGTTTGGACGAGATAG         |
| 30[159] | 31[167] | ATCACGCATTGACGAGCACGTATA                 |
| 30[191] | 31[199] | TCAGTGAGAGAATCAGAGCGGGAG                 |
| 31[72]  | 29[79]  | TAGAGCTTGACGGGGAAAAGAACGTGGACTCCGGCAAAAT |
| 31[104] | 31[135] | CGAGAAAGGAAGGGAATGCGCCGCTACAGGGC         |
| 31[136] | 29[143] | GCGTACTATGTTGCTAATTAACCGTTGTAGCCCTGAGTA  |

---

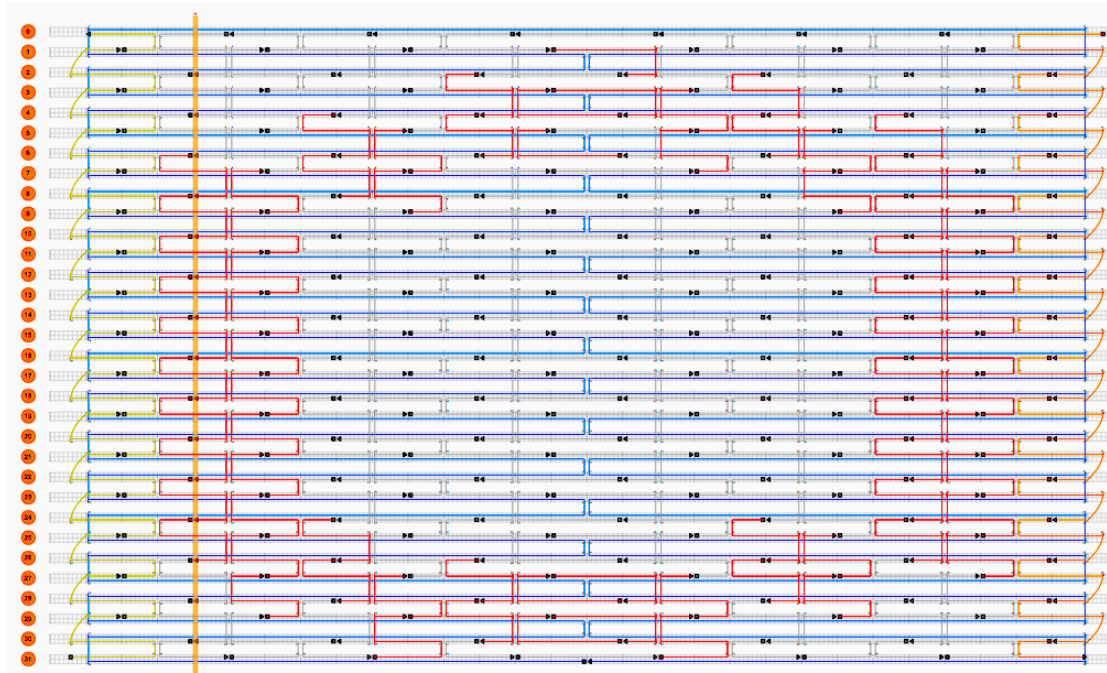

O

|         |         |                                   |
|---------|---------|-----------------------------------|
| 1[112]  | 2[128]  | TTTGTCTGATACAGGAGTGTACTATACATGG   |
| 2[95]   | 4[96]   | TTTCTGTAGTGAATTTCTTAAACAACAACCAT  |
| 2[159]  | 4[160]  | GAATTTACCCCTCAGAGCCACCACTCTTTTCA  |
| 3[112]  | 4[128]  | CCGATAGTCTCCCTCAGAGCCGCCACCACC    |
| 4[63]   | 6[64]   | AGGCTTGCAAAGACTTTTTTCATGATGACCCCC |
| 4[95]   | 6[96]   | CGCCACGCGGGTAAAATACGTAAGAGGCCAAA  |
| 4[127]  | 3[111]  | GGAACCGCTGCGCCGACAATGACAGCTTGATA  |
| 4[159]  | 6[160]  | TAATCAAATAGCAAGGCCGAAACTAAAGGTG   |
| 4[191]  | 6[192]  | TAGCCCCCTCGATAGCAGCACCGTAGGGAAGG  |
| 5[144]  | 3[143]  | ATTACCATATCACCGGAACCAGAGACCCTCAG  |
| 6[31]   | 8[32]   | CGGAGATTGCGACCTGCTCCATGACGTAACA   |
| 6[63]   | 8[64]   | AGCGATTAAGGGCAGACGGTCAATGACAAGA   |
| 6[127]  | 5[111]  | GAATTAGACCAACCTAAAACGAAATGCCACTA  |
| 6[191]  | 8[192]  | TAAATATTTTATTTTGTACAATCCCGAGGAA   |
| 7[80]   | 5[79]   | GAACCGAACTAAAACACTCATCTTGAAGTTT   |
| 7[144]  | 5[143]  | GCAACATACCGTCACCGACTTGAGGTAGCACC  |
| 7[176]  | 5[175]  | GAATAAGTGACGGAAATTATTCATGTCACCAA  |
| 8[31]   | 10[32]  | AAGCTGCTACACCAGAACGAGTAGATCAGTTG  |
| 8[191]  | 10[192] | ACGCAATAATGAAATAGCAATAGCAGAGAATA  |
| 9[48]   | 7[47]   | GCTTGAGATTCATTACCCAAATCATTACTTAG  |
| 9[80]   | 7[79]   | TGTGAATTCATCAAGAGTAATCTTCATAAGG   |
| 9[176]  | 7[175]  | AAGAAACAATAACGGAATACCCAAACACCACG  |
| 9[208]  | 7[207]  | CGAAGCCCAGTTACCAGAAGGAAAAATAGAAA  |
| 10[31]  | 12[32]  | AGATTTAGCGCCAAAAGGAATTACCATTGAAT  |
| 10[191] | 12[192] | ACATAAAAACAGCCATATTATTTATTAGCGAA  |
| 11[48]  | 9[47]   | GTAAGAGCACAGGTAGAAAGATTCTAAATTGG  |
| 11[208] | 9[207]  | CAAATAAGATAGCAGCCTTTACAGTATCTTAC  |

|         |         |                                         |
|---------|---------|-----------------------------------------|
| 12[31]  | 14[32]  | CCCCCTCACCATAAATCAAAAATCATTGCTCC        |
| 12[191] | 14[192] | CCTCCCGACGTAGGAATCATTACCGAACAAGA        |
| 13[48]  | 11[47]  | ACCCTGACAATCGTCATAAATATTGAGGCATA        |
| 13[208] | 11[207] | TAGCAAGCAAGAACGCGAGGCGTTTCCCAATC        |
| 14[31]  | 16[32]  | TTTTGATAATTGCTGAATATAATGGGGGCGCG        |
| 14[191] | 16[192] | AAAATAATAATTCTGTCCAGACGACAAAATTCT       |
| 15[48]  | 13[47]  | CAACATGTTTAGAGAGTACCTTTAAGGTCTTT        |
| 15[208] | 13[207] | AACAACATACAATAGATAAGTCTGCGCCCAA         |
| 16[31]  | 18[32]  | AGCTGAAATTAACATCCAATAAATAAATGCAA        |
| 16[191] | 18[192] | TACCAGTAGATAAATAAGGCGTTAGGCTTAGG        |
| 17[48]  | 15[47]  | CAAGGCAAAGCTATATTTTCATTCTGTAGCT         |
| 17[208] | 15[207] | TAAACACCTATCATATGCGTTATACGACAATA        |
| 18[31]  | 20[32]  | TGCCTGAGAAGGCCGAGACAGTCTCATATGT         |
| 18[191] | 20[192] | TTGGGTAAAGCTTAGATTAAGACGATTAATTA        |
| 19[48]  | 17[47]  | ATCAATATAACCCCTCATATTTTCATACAGG         |
| 19[208] | 17[207] | AGTCAATATACCTTTTTAACCTCCAATAAGAA        |
| 20[31]  | 22[32]  | ACCCCGTTTTGTATAAGCAAATATGATTCTCC        |
| 20[191] | 22[192] | CATTTAACACAAAATCGCGCAGAGATATCAAA        |
| 21[48]  | 19[47]  | TAAACGTTAAACTAGCATGTCAAAAATCACC         |
| 21[208] | 19[207] | TTCATTTACATCAAGAAAACAACTGAGAAG          |
| 22[31]  | 24[32]  | GTGGGAACCGTTGGTGTAGATGGGGTGCGGGC        |
| 22[191] | 24[192] | ATTATTTGTATCAGATGATGGCAAAGTATTA         |
| 23[48]  | 21[47]  | AACCGTGCGAGTAACAACCCGTCGTTAAATTG        |
| 23[208] | 21[207] | TATAATCCAGGGTTAGAACCTACCGCAATTA         |
| 24[31]  | 26[32]  | CTCTTCGCGCAAGGCGATTAAGTTTTCCACAC        |
| 24[63]  | 26[64]  | CGCAACTGTTCCAGTCACGACGTGTTTCCTG         |
| 24[159] | 26[160] | ATCCTTTGGTTGGCAAATCAACAGGAGAGCCA        |
| 24[191] | 26[192] | GACTTTACAAGGTTATCTAAAATAAGTATTA         |
| 25[48]  | 23[47]  | CCAGGGTTTTGGGAAGGGCGATCGCGCATCGT        |
| 25[208] | 23[207] | AGCACTAACATTTGAGGATTTAGTTCATCAA         |
| 26[63]  | 28[64]  | TGTGAAATTTGCGCTCACTGCCCGCTTTTCAC        |
| 26[95]  | 28[96]  | GAATTCGTCTGTGCGTCCAGCTGCGGTTTGC         |
| 26[159] | 28[160] | GCAGCAAATATTTTTGAATGGCTACCAGTAA         |
| 27[48]  | 25[47]  | TAATTGCGTGTTATCCGCTCACAAGGGTAACG        |
| 27[112] | 28[128] | AATCGGCCACCTGAAAGCGTAAGAAGATAGAA        |
| 27[176] | 25[175] | TTAATGCGGCAACAGTGCCACGCTTTGAAAGG        |
| 27[208] | 25[207] | CCATTAACAGAGGTGAGGCGGTCTCTTAGG          |
| 28[95]  | 30[96]  | GTATTGGGAATCAAAGAATAGCCACAAGAGT         |
| 28[127] | 27[111] | CCCTTCTGAACGCGCGGGGAGAGGCATTAATG        |
| 29[48]  | 27[47]  | CTGTTTGACGGGCAACAGCTGATTACTCATAT        |
| 29[80]  | 27[79]  | CCCTTATACGCCAGGGTGGTTTTTCTTTCCAG        |
| 29[112] | 30[128] | GGTTGAGTGAATAACATCACTTGAATACTTC         |
| 29[144] | 27[143] | GAAGAACTACATTCTGGCCAACAGATACGTGG        |
| 29[176] | 27[175] | ATCCAGAAATTCACCAGTCACACGATTAGTCT        |
| 30[127] | 29[111] | TTTGATTAGTTGTTCCAGTTTGGACGAGATAG        |
| 31[72]  | 29[79]  | TAGAGCTTGACGGGGAAAAGAACGTGGACTCCGGCAAAT |

|              |         |                                           |
|--------------|---------|-------------------------------------------|
| 31[136]      | 29[143] | GCGTACTATGGTTGCTAATTAACCGTTGTAGCCCTGAGTA  |
| O background |         |                                           |
| 0[39]        | 2[32]   | CACCACCCTCATTTTCCGTAACACTGAGTTTCAAAGGAAC  |
| 0[71]        | 2[64]   | ACCGCCACCCTCAGAAACAACGCCTGTAGCATAACTTTCA  |
| 0[103]       | 2[96]   | TACTCAGGAGGTTTAGATAGTTAGCGTAACGAAAATGAAT  |
| 0[135]       | 0[104]  | TATAAGTATAGCCCAGGAATAGGTGTATCACCG         |
| 0[167]       | 2[160]  | ACCAGGCGGATAAGTGGGGTTCAGTGCCTTGACAGTCTCT  |
| 0[199]       | 2[192]  | GAAGGATTAGGATTAGAAAACAGTTAATGCCCCATAAATCC |
| 1[48]        | 0[40]   | TACAAACTCCGCCACCCTCAGAGC                  |
| 1[80]        | 0[72]   | CAGCCCTCTACGCCACCCTCAGA                   |
| 1[144]       | 0[136]  | GTTTTAACCCGTCGAGAGGGTTGA                  |
| 1[176]       | 0[168]  | GCCCGTATCGGGGTTTTGCTCAGT                  |
| 1[208]       | 0[200]  | TTCGGAACCTGAGACTCCTCAAGA                  |
| 2[31]        | 4[32]   | AACTAAAGATCTCCAAAAAAGGCTTTTGCG            |
| 2[63]        | 4[64]   | ACAGTTTCTAATTGTATCGGTTTAGGTCGCTG          |
| 2[127]       | 1[111]  | CTTTTGATCTTTCCAGACGTTAGTTCTAAAAGT         |
| 2[191]       | 4[192]  | TCATTAAGAAGAACACCACCAGAGTTCGGTCA          |
| 3[48]        | 1[47]   | GGAGCCTTAGCGGAGTGAGAATAGGTCACCAG          |
| 3[80]        | 1[79]   | CTTTCGAGTGGGATTTTGCTAACTCCACAGA           |
| 3[144]       | 1[143]  | AACCGCCACGTTCCAGTAAGCGTCGGTAATAA          |
| 3[176]       | 1[175]  | CCGCCACCGCCAGAATGGAAAGCGGTAACAGT          |
| 3[208]       | 1[207]  | AGCATTGATGATATTCACAAACAATGCCTAT           |
| 4[31]        | 6[32]   | GGATCGTCGGGTAGCAACGGCTACAAGTACAA          |
| 5[48]        | 3[47]   | TGAGGACTAGGGAGTTAAAGGCCGCTCCAAAA          |
| 5[80]        | 3[79]   | CCATTAACATAACCGATATATTCTCAGCTTG           |
| 5[112]       | 6[128]  | CGAAGGCAGCCAGCAAAATCACCACCATTTGG          |
| 5[176]       | 3[175]  | TGAAACCATTATTAGCGTTTGCCACCTCAGAG          |
| 5[208]       | 3[207]  | GCGACAGACGTTTTTCATCGGCATTCCGCCGCC         |
| 6[95]        | 8[96]   | AGAATACACTGACCAACTTTGAAAATAGGCTG          |
| 6[159]       | 8[160]  | AATTATCATAAAAGAAACGCAAGAAGAAGTCTG         |
| 7[48]        | 5[47]   | CCGGAACGTACCAAGCGCGAAACAAGAGGCTT          |
| 7[112]       | 8[128]  | ATGAACGGGTAGAAAATACATACACAGTATGT          |
| 7[208]       | 5[207]  | ATTCATATTTCAACCGATTGAGGGAATCAGTA          |
| 8[63]        | 10[64]  | ACCGGATATGGTTTAATTTCAACTACGGAACA          |
| 8[95]        | 10[96]  | GCTGACCTACCTTATGCGATTTTAGGAAGAAA          |
| 8[127]       | 7[111]  | TAGCAAAGTACAGACCAGGCGGAGGACAG             |
| 8[159]       | 10[160] | GCATGATTTGAGTTAAGCCCAATAGACGGGAG          |
| 9[112]       | 10[128] | CTCATTATGCGCTAATATCAGAGAGTCAGAGG          |
| 9[144]       | 7[143]  | ACAAGAATAAGACTCCTTATTACGTAAGGTTG          |
| 10[63]       | 12[64]  | ACATTATTAACACTATCATAACCCGCGTCCAA          |
| 10[95]       | 12[96]  | AATCTACGGATAAAAACCAAAATAAGGGGGTA          |
| 10[127]      | 9[111]  | GTAATTGAACCAGTCAGGACGTTGAGAACTGG          |
| 10[159]      | 12[160] | AATTAACCTTCCAGACCTAATTTAAGCCTTA           |
| 11[80]       | 9[79]   | CAGACGACTTAATAAAACGAACTATTAATCAT          |
| 11[112]      | 12[128] | CTTTGCAATCCTGAATCTTACCAACCCAGCT           |



|         |         |                                   |
|---------|---------|-----------------------------------|
| 11[144] | 9[143]  | GAGCGTCTGAACACCCTGAACAAAGATAACCC  |
| 11[176] | 9[175]  | CAAAATAAACAGGGAAGCGCATTAAATAAGAGC |
| 12[63]  | 14[64]  | TACTGCGGTATTATAGTCAGAAGCCTCCAACA  |
| 12[95]  | 14[96]  | ATAGTAAAAAAGATTAAGAGGAACGAGCTTC   |
| 12[127] | 11[111] | ACAATTTTAAAGAAGTTTTGCCAGGCGAGAGG  |
| 12[159] | 14[160] | AATCAAGAATCGAGAACAAGCAAGCGAGCATG  |
| 13[80]  | 11[79]  | TTGCATCAATGTTTAGACTGGATATCGTTTAC  |
| 13[112] | 14[128] | GACTTCAACAAGAACGGGTATTAATCTTTCCT  |
| 13[144] | 11[143] | CCGCACTCTAGTTGCTATTTTGCACGCTAAC   |
| 13[176] | 11[175] | ATTTTCATCTTGCGGGAGGTTTTGGCCAGTTA  |
| 14[63]  | 16[64]  | GGTCAGGATTTAAATATGCAACTAGGTCAATA  |
| 14[95]  | 16[96]  | AAAGCGAAAGTTTCATTCCATATATTTAGTTT  |
| 14[127] | 13[111] | TATCATTCAATCGCGTTTTAATTGCCCGAAA   |
| 14[159] | 16[160] | TAGAAACCAGAGAATATAAAGTACCAGTAGGG  |
| 15[80]  | 13[79]  | TGTCTGGACCAGACCGGAAGCAAAAAAGCGGA  |
| 15[112] | 16[128] | TTCCCAATATTTAGGCAGAGGCATACAACGCC  |
| 15[144] | 13[143] | CAGTAATAAATCAATAATCGGCTGACCAAGTA  |
| 15[176] | 13[175] | GGTAAAGTATCCCATCCTAATTTACCGTTTTT  |
| 16[63]  | 18[64]  | ACCTGTTTAGAATTAGCAAAATTAGGATAAAA  |
| 16[95]  | 18[96]  | GACCATTAAGCATAAAGCTAAATCCTTTTGCG  |
| 16[127] | 15[111] | AACATGTATCTGCGAACGAGTAGAACAGTTGA  |
| 16[159] | 18[160] | CTTAATTGCTAAATTTAATGGTTTTGCTGATG  |
| 17[80]  | 15[79]  | AGCCTCAGGATACATTTTCGCAAATAAGTACGG |
| 17[112] | 18[128] | CAAAAACACAAATATATTTTAGTTCGCGAGAA  |
| 17[144] | 15[143] | CTTCTGACAGAATCGCCATATTTATTTGAGC   |
| 17[176] | 15[175] | GACCGTGTTAAAGCCAACGCTCAACGACAAAA  |
| 18[63]  | 20[64]  | ATTTTTAGGATATTCAACCGTTCTGATGAACG  |
| 18[95]  | 20[96]  | GGAGAAGCCCGGAGAGGGTAGCTATTGCCTGA  |
| 18[127] | 17[111] | AACTTTTTTTATGACCCTGTAATAGTTGTAC   |
| 18[159] | 20[160] | CAAATCCATTTTCCCTTAGAATCCCCTTTTTT  |
| 19[80]  | 17[79]  | AATTAATGCTTTATTTCAACGCAAAGCAATAA  |
| 19[112] | 20[128] | AGATCTACCCTTGCTTCTGTAATATATGTGA   |
| 19[144] | 17[143] | TTAATTAATCGCAAGACAAAGAAAATTTTCAT  |
| 19[176] | 17[175] | ATAGCGATTATAACTATATGTAAAGAAATACC  |
| 20[63]  | 22[64]  | GTAATCGTAATATTTTGTTAAAATAACATTAA  |
| 20[95]  | 22[96]  | GAGTCTGGTTAAATCAGCTCATTTTCGCGTCTG |
| 20[127] | 19[111] | GTGAATAAAAAGGCTATCAGGTCATTTTTGAG  |
| 20[159] | 22[160] | AATGGAAACGGATTCGCCTGATTGAAAGAAAT  |
| 21[80]  | 19[79]  | AATTTTTGAGCAAACAAGAGAATCAGCTGATA  |
| 21[112] | 22[128] | ATAGGAACAACAGTACCTTTTACACAGATGAA  |
| 21[144] | 19[143] | AACAATAACAGTACATAAATCAATCGTCGCTA  |
| 21[176] | 19[175] | ACCAAGTTAATTTCAATTTGAATTATTGAAAAC |
| 22[63]  | 24[64]  | ATGTGAGCATCTGCCAGTTTGAGGTCAGGCTG  |
| 22[95]  | 24[96]  | GCCTTCCTGGCCTCAGGAAGATCGTGCCGGAA  |
| 22[127] | 21[111] | TATACAGTGCCATCAAAAATAATTTTAAACCA  |
| 22[159] | 24[160] | TGCGTAGAAGAAGGAGCGGAATTACGTATTAA  |

|         |         |                                          |
|---------|---------|------------------------------------------|
| 23[80]  | 21[79]  | ACAGTATCGTAGCCAGCTTTCATCTCGCATT          |
| 23[112] | 24[128] | CCAGCTTACATTATCATTGCGTTAAAAG             |
| 23[144] | 21[143] | AAACCACCTTTCAGGTTAACGTTCCGGGAGA          |
| 23[176] | 21[175] | TTCCTGATCACGTAACAGAAATCTTGAAT            |
| 24[95]  | 26[96]  | ACCAGGCAGTGCCAAGCTTGCATGCCGAGCTC         |
| 24[127] | 23[111] | TTTGAGTACCGGCACCGCTTCTGGCACTCCAG         |
| 25[80]  | 23[79]  | GACGGCCAAAGCGCCATTCGCCATGGACGACG         |
| 25[112] | 26[128] | TCGACTCTCAAATATCAAACCCTCTCACCTTG         |
| 25[144] | 23[143] | TCTGGTCACCGAACGTTATTAATGAACAAAG          |
| 25[176] | 23[175] | AATTGAGGAAACAATTCGACAACCTTCATCATA        |
| 26[31]  | 28[32]  | AACATACGCCTAATGAGTGAGCTAGCCCTTCA         |
| 26[127] | 25[111] | CTGAACCTAGAGGATCCCCGGGTACCTGCAGG         |
| 26[191] | 28[192] | CACCGCCTCGAACTGATAGCCCTATTATTAC          |
| 27[80]  | 25[79]  | TCGGGAAAAATCATGGTCATAGCTTGAAAAAC         |
| 27[144] | 25[143] | CACAGACATGAAAAATCTAAAGCAAATCAATA         |
| 28[31]  | 30[32]  | CCGCCTGGGGTTTGGCCAGCAGGCGATGGCC          |
| 28[63]  | 30[64]  | CAGTGAGATGGTGGTCCGAAATCAACGTCAA          |
| 28[159] | 30[160] | TAAAAGGGCAAATATCGGCCTTGGTCTGTCC          |
| 28[191] | 30[192] | ATTGGCAGCAATATTACCGCCAGCTTTTATAA         |
| 29[208] | 27[207] | CAGGAAAAATCGTCTGAAATGGAAAACATCG          |
| 30[31]  | 31[39]  | CACTACGTGAGGTGCCGTAAAGCA                 |
| 30[63]  | 31[71]  | AGGGCGAAAAGGGAGCCCCCGATT                 |
| 30[95]  | 31[103] | CCACTATTAAGCCGGCGAACGTGG                 |
| 30[159] | 31[167] | ATCACGCATTGACGAGCACGTATA                 |
| 30[191] | 31[199] | TCAGTGAGAGAATCAGAGCGGGAG                 |
| 31[40]  | 29[47]  | CTAAATCGGAACCCTAAAACCGTCTATCAGGGCGAAAATC |
| 31[104] | 31[135] | CGAGAAAGGAAGGAATGCGCCGCTACAGGGC          |
| 31[168] | 29[175] | ACGTGCTTTCCTCGTTGCCACCGAGTAAAAGACTGGTAAT |
| 31[200] | 29[207] | CTAAACAGGAGGCCGAGAATCCTGAGAAGTGCATTGCAA  |

---

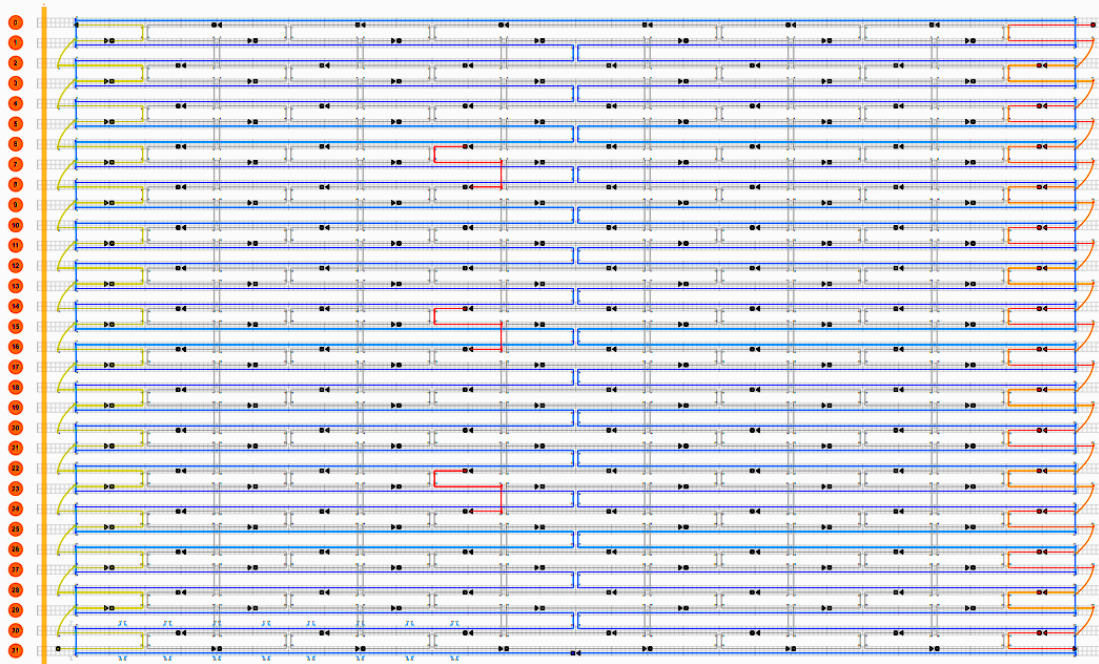

Three-dotted pattern

|        |        |                                              |
|--------|--------|----------------------------------------------|
| 6[95]  | 8[96]  | AGAATACACTGACCAACTTTGAAAATAGGCTG-GTGCAGACAAC |
| 14[95] | 16[96] | AAAGCGAAAGTTTCATTCCATATATTTAGTTT-GTGCAGACAAC |
| 22[95] | 24[96] | GCCTTCTGGCCTCAGGAAGATCGTGCCGGAA-GTGCAGACAAC  |

Background for three-dotted pattern

|        |        |                                                  |
|--------|--------|--------------------------------------------------|
| 0[39]  | 2[32]  | CACCACCCTCATTTTCCGTAACACTGAGTTTCAAAGGAAC         |
| 0[71]  | 2[64]  | ACCGCCACCCTCAGAAACAACGCCTGTAGCATAACTTTCA         |
| 0[103] | 2[96]  | TACTCAGGAGGTTTAGATAGTTAGCGTAACGAAAATGAAT         |
| 0[135] | 0[104] | TATAAGTATAGCCCGAATAGGTGTATCACCG                  |
| 0[167] | 2[160] | ACCAGGCGGATAAGTGGGGTCAGTGCCTTGACAGTCTCT          |
| 0[199] | 2[192] | GAAGGATTAGGATTAGAAACAGTTAATGCCCCATAAATCC         |
| 0[235] | 2[224] | TTTTTGAAAGTATTAAGAGGCTATTATTCTGAAACATTTTGTGACACG |
| 1[16]  | 0[8]   | CCATGTACAGGGATAGCAAGCCCA                         |
| 1[48]  | 0[40]  | TACAAACTCCGCCACCCTCAGAGC                         |
| 1[80]  | 0[72]  | CAGCCCTCTACGCCACCCTCAGA                          |
| 1[112] | 2[128] | TTTGTGCGTATACAGGAGTGTACTATACATGG                 |
| 1[144] | 0[136] | GTTTTAACCCGTCGAGAGGGTTGA                         |
| 1[176] | 0[168] | GCCCGTATCGGGTTTTGCTCAGT                          |
| 1[208] | 0[200] | TTCGGAACCTGAGACTCCTCAAGA                         |

|        |        |                                      |
|--------|--------|--------------------------------------|
| 2[31]  | 4[32]  | AACTAAAGATCTCCAAAAAAAAGGCTTTTGCG     |
| 2[63]  | 4[64]  | ACAGTTTCTAATTGTATCGGTTTAGGTCGCTG     |
| 2[95]  | 4[96]  | TTTCTGTAGTGAATTTCTTAAACAACAACCAT     |
| 2[127] | 1[111] | CTTTTGATCTTCCAGACGTTAGTTCTAAAGT      |
| 2[159] | 4[160] | GAATTTACCCCTCAGAGCCACCACTCTTTTCA     |
| 2[191] | 4[192] | TCATTAAGAAGAACCAACCAGAGTTCGGTCA      |
| 2[223] | 4[224] | ATTGGCCTCAGGAGGTTGAGGCAGTTTTGCGTCAGA |
| 3[16]  | 1[15]  | CGTTGAAAGAATTGCGAATAATAATTTTATAGGAAC |
| 3[48]  | 1[47]  | GGAGCCTTAGCGGAGTGAGAATAGGTCACCAG     |
| 3[80]  | 1[79]  | CTTTCGAGTGGGATTTTGCTAAACTCCACAGA     |
| 3[112] | 4[128] | CCGATAGTCTCCCTCAGAGCCGCCACCACC       |
| 3[144] | 1[143] | AACCGCCACGTTCCAGTAAGCGTCGGTAATAA     |
| 3[176] | 1[175] | CCGCCACCGCCAGAATGGAAAGCGGTAACAGT     |
| 3[208] | 1[207] | AGCATTGATGATATTCACAAACAACTGCCTAT     |
| 4[31]  | 6[32]  | GGATCGTCGGGTAGCAACGGCTACAAGTACAA     |
| 4[63]  | 6[64]  | AGGCTTGCAAAGACTTTTTTCATGATGACCCCC    |
| 4[95]  | 6[96]  | CGCCACGCGGGTAAAATACGTAAGAGGCCAAA     |
| 4[127] | 3[111] | GGAACCGCTGCGCCGACAATGACAGCTTGATA     |
| 4[159] | 6[160] | TAATCAAATAGCAAGGCCGGAACTAAAGGTG      |
| 4[191] | 6[192] | TAGCCCCCTCGATAGCAGCACCGTAGGGAAGG     |
| 4[223] | 6[224] | CTGTAGCGATCAAGTTTGCCTTTATTTTAGACAAAA |
| 5[16]  | 3[15]  | CGGAACGAACCCTCAGCAGCGAAATTTTTTTTTTCA |
| 5[48]  | 3[47]  | TGAGGACTAGGGAGTTAAAGGCCGCTCCAAAA     |
| 5[80]  | 3[79]  | CCATTAACATAACCGATATATTCTCAGCTTG      |
| 5[112] | 6[128] | CGAAGGCAGCCAGCAAATCACCACCATTGG       |
| 5[144] | 3[143] | ATTACCATATCACCGGAACCAGAGACCCTCAG     |
| 5[176] | 3[175] | TGAAACCATTATTAGCGTTTGCCACCTCAGAG     |
| 5[208] | 3[207] | GCGACAGACGTTTTTCATCGGCATTCCGCCGCC    |
| 6[31]  | 8[32]  | CGGAGATTCGCGACCTGCTCCATGACGTAACA     |
| 6[63]  | 8[64]  | AGCGATTAAGGCGCAGACGGTCAATGACAAGA     |
| 6[127] | 5[111] | GAATTAGACCAACCTAAAACGAAATGCCACTA     |

|         |         |                                      |
|---------|---------|--------------------------------------|
| 6[159]  | 8[160]  | AATTATCATAAAAGAAACGCAAAGAAGAACTG     |
| 6[191]  | 8[192]  | TAAATATTTTATTTTGTCCACAATCCCGAGGAA    |
| 6[223]  | 8[224]  | GGGCGACAGGTTTACCAGCGCCAATTTTGCAGATAG |
| 7[16]   | 5[15]   | TCGAAATCTGTATCATCGCCTGATTTTTGACAGCAT |
| 7[48]   | 5[47]   | CCGGAACGTACCAAGCGCGAAACAAGAGGCTT     |
| 7[80]   | 5[79]   | GAACCGAACTAAAACACTCATCTTGGAAGTTT     |
| 7[112]  | 8[128]  | ATGAACGGGTAGAAAATACATACAGTATGT       |
| 7[144]  | 5[143]  | GCAACATACCGTCACCGACTTGAGGTAGCACC     |
| 7[176]  | 5[175]  | GAATAAGTGACGGAAATTATTCATGTCACCAA     |
| 7[208]  | 5[207]  | ATTCATATTTCAACCGATTGAGGGAATCAGTA     |
| 8[31]   | 10[32]  | AAGCTGCTACACCAGAACGAGTAGATCAGTTG     |
| 8[63]   | 10[64]  | ACCGGATATGGTTTAATTTCAACTACGGAACA     |
| 8[95]   | 10[96]  | GCTGACCTACCTTATGCGATTTTAGGAAGAAA     |
| 8[127]  | 7[111]  | TAGCAAAGTGTACAGACCAGGCGCGAGGACAG     |
| 8[159]  | 10[160] | GCATGATTTGAGTTAAGCCCAATAGACGGGAG     |
| 8[191]  | 10[192] | ACGCAATAATGAAATAGCAATAGCAGAGAATA     |
| 8[223]  | 10[224] | CCGAACAATTTTAAAGAAAAGTAATTTAACGTCAA  |
| 9[16]   | 7[15]   | GACGAGAACATTCAGTGAATAAGGTTTTAAATTGTG |
| 9[48]   | 7[47]   | GCTTGAGATTCATTACCCAAATCATTACTTAG     |
| 9[80]   | 7[79]   | TGTGAATTCATCAAGAGTAATCTTCATAAGG      |
| 9[112]  | 10[128] | CTCATTATGCGCTAATATCAGAGAGTCAGAGG     |
| 9[144]  | 7[143]  | ACAAGAATAAGACTCCTTATTACGTAAGGTG      |
| 9[176]  | 7[175]  | AAGAAACAATAACGGAATACCCAAACACCACG     |
| 9[208]  | 7[207]  | CGAAGCCCAGTTACCAGAAGGAAAAATAGAAA     |
| 10[31]  | 12[32]  | AGATTTAGCGCCAAAAGGAATTACCATTGAAT     |
| 10[63]  | 12[64]  | ACATTATTAACACTATCATAACCCGCGTCCAA     |
| 10[95]  | 12[96]  | AATCTACGATAAAAACCAAATAAGGGGGTA       |
| 10[127] | 9[111]  | GTAATTGAACCAGTCAGGACGTTGAGAACTGG     |
| 10[159] | 12[160] | AATTAACTTTCCAGAGCCTAATTTAAGCCTTA     |
| 10[191] | 12[192] | ACATAAAAACAGCCATATTATTTATTAGCGAA     |
| 10[223] | 12[224] | AAATGAAAAACGATTTTTTGTTTTTTGCTTATCC   |

|         |         |                                      |
|---------|---------|--------------------------------------|
| 11[16]  | 9[15]   | ATACATAAGAATACCACATTCAACTTTTCTTGCCCT |
| 11[48]  | 9[47]   | GTAAGAGCACAGGTAGAAAAGATTCTAAATTGG    |
| 11[80]  | 9[79]   | CAGACGACTTAATAAAACGAACTATTAATCAT     |
| 11[112] | 12[128] | CTTTTGCAATCCTGAATCTTACCAACCCAGCT     |
| 11[144] | 9[143]  | GAGCGTCTGAACACCCTGAACAAAGATAACCC     |
| 11[176] | 9[175]  | CAAATAAACAGGGAAGCGCATTAAATAAGAGC     |
| 11[208] | 9[207]  | CAAATAAGATAGCAGCCTTTACAGTATCTTAC     |
| 12[31]  | 14[32]  | CCCCCTACCATAAAATCAAAAATCATTGCTCC     |
| 12[63]  | 14[64]  | TACTGCGGTATTATAGTCAGAAGCCTCCAACA     |
| 12[95]  | 14[96]  | ATAGTAAAAAAGATTAAGAGGAACGAGCTTC      |
| 12[127] | 11[111] | ACAATTTTAAAGAAGTTTTGCCAGGCGAGAGG     |
| 12[159] | 14[160] | AATCAAGAATCGAGAACAAGCAAGCGAGCATG     |
| 12[191] | 14[192] | CCTCCCGACGTAGGAATCATTACCGAACCAAGA    |
| 12[223] | 14[224] | GGTATTCTAAATCAGATATAGAAGTTTTACGCGCCT |
| 13[16]  | 11[15]  | GAGAATGAAATGCTTTAAACAGTTTTTTAATGCAG  |
| 13[48]  | 11[47]  | ACCCTGACAATCGTCATAAATATTGAGGCATA     |
| 13[80]  | 11[79]  | TTGCATCAATGTTTAGACTGGATATCGTTTAC     |
| 13[112] | 14[128] | GACTTCAACAAGAACGGGTATTAATCTTTCCT     |
| 13[144] | 11[143] | CCGCACTCTAGTTGCTATTTTGACGCTAAC       |
| 13[176] | 11[175] | ATTTTCATCTTGCGGGAGGTTTTGGCCAGTTA     |
| 13[208] | 11[207] | TAGCAAGCAAGAACGCGAGGCGTTTCCCAATC     |
| 14[31]  | 16[32]  | TTTTGATAATTGCTGAATATAATGGGGGCGCG     |
| 14[63]  | 16[64]  | GGTCAGGATTTAAATATGCAACTAGGTCAATA     |
| 14[127] | 13[111] | TATCATTATATCGCGTTTTAATTGCCGAAA       |
| 14[159] | 16[160] | TAGAAACCAGAGAATATAAAGTACCAGTAGGG     |
| 14[191] | 16[192] | AAAATAATAATTCTGTCCAGACGACAAATTCT     |
| 14[223] | 16[224] | GTTTATCAGTTCAGCTAATGCAGATTTTGAAAAAGC |
| 15[16]  | 13[15]  | AGAGCTTAAGAGGTCATTTTTGCGTTTTAGAAAAC  |
| 15[48]  | 13[47]  | CAACATGTTTAGAGAGTACCTTTAAGGTCTTT     |
| 15[80]  | 13[79]  | TGTCTGGACCAGACCGGAAGCAAAAAAGCGGA     |
| 15[112] | 16[128] | TTCCAATATTTAGGCAGAGGCATACAACGCC      |

|         |         |                                      |
|---------|---------|--------------------------------------|
| 15[144] | 13[143] | CAGTAATAAATCAATAATCGGCTGACCAAGTA     |
| 15[176] | 13[175] | GGTAAAGTATCCCATCCTAATTTACCGTTTTT     |
| 15[208] | 13[207] | AACAACATACAATAGATAAGTCCTGCGCCCAA     |
| 16[31]  | 18[32]  | AGCTGAAATTAACATCCAATAAATAAATGCAA     |
| 16[63]  | 18[64]  | ACCTGTTTAGAATTAGCAAAATTAGGATAAAA     |
| 16[95]  | 18[96]  | GACCATTAAGCATAAAGCTAAATCCTTTTGCG     |
| 16[127] | 15[111] | AACATGTATCTGCGAACGAGTAGAACAGTTGA     |
| 16[159] | 18[160] | CTTAATTGCTAAATTTAATGGTTTTGCTGATG     |
| 16[191] | 18[192] | TACCAGTAGATAAATAAGGCGTTAGGCTTAGG     |
| 16[223] | 18[224] | CTGTTTAGGGAATCATAATTACTATTTTCATAGGTC |
| 17[16]  | 15[15]  | TAGTAGCAAGGTGGCATCAATCTTTTTGATGGCTT  |
| 17[48]  | 15[47]  | CAAGGCAAAGCTATATTTTCATTTCTGTAGCT     |
| 17[80]  | 15[79]  | AGCCTCAGGATACATTTGCAATAAAGTACGG      |
| 17[112] | 18[128] | CAAAAACACAAATATATTTTAGTTCGCGAGAA     |
| 17[144] | 15[143] | CTTCTGACAGAATCGCCATATTTATTTGAGC      |
| 17[176] | 15[175] | GACCGTGTTAAAGCCAACGCTCAACGACAAAA     |
| 17[208] | 15[207] | TAAACACCTATCATATGCGTTATACGACAATA     |
| 18[31]  | 20[32]  | TGCCTGAGAAGGCCGGAGACAGTCTCATATGT     |
| 18[63]  | 20[64]  | ATTTTTAGGATATTCAACCGTTCTGATGAACG     |
| 18[95]  | 20[96]  | GGAGAAGCCCGGAGAGGGTAGCTATTGCCTGA     |
| 18[127] | 17[111] | AACTTTTTTATGACCCTGTAATAGGTTGTAC      |
| 18[159] | 20[160] | CAAATCCATTTCCCTTAGAATCCCCTTTTTT      |
| 18[191] | 20[192] | TTGGGTTAAGCTTAGATTAAGACGATTAATTA     |
| 18[223] | 20[224] | TGAGAGACGTGAATTTATCAAAATTTTGAAGATGA  |
| 19[16]  | 17[15]  | GGGTGAGATAATGTGTAGGTAAAGTTTTACTAATAG |
| 19[48]  | 17[47]  | ATCAATATAACCCTCATATATTTTCATACAGG     |
| 19[80]  | 17[79]  | AATTAATGCTTTATTTCAACGCAAAGCAATAA     |
| 19[112] | 20[128] | AGATCTACCCTTGCTTCTGTAAATATATGTGA     |
| 19[144] | 17[143] | TTAATTAATCGCAAGACAAAGAAAATTTTCAT     |
| 19[176] | 17[175] | ATAGCGATTATAACTATATGTAAAGAAATACC     |
| 19[208] | 17[207] | AGTCAATATACCTTTTTAACCTCCAATAAGAA     |

|         |         |                                      |
|---------|---------|--------------------------------------|
| 20[31]  | 22[32]  | ACCCCGGTTTGTATAAGCAAATATGATTCTCC     |
| 20[63]  | 22[64]  | GTAATCGTAATATTTTGTAAAATAACATTAA      |
| 20[95]  | 22[96]  | GAGTCTGGTTAAATCAGCTCATTTTCGCGTCTG    |
| 20[127] | 19[111] | GTGAATAAAAAGGCTATCAGGTCATTTTGTAG     |
| 20[159] | 22[160] | AATGGAAACGGATTCGCCTGATTGAAAGAAAT     |
| 20[191] | 22[192] | CATTTAACACAAAATCGCGCAGAGATATCAA      |
| 20[223] | 22[224] | TGAAACAAAATTACCTGAGCAAAATTTTACTTCTGA |
| 21[16]  | 19[15]  | CAGGAAGATGATAATCAGAAAAGCTTTTATTCAAAA |
| 21[48]  | 19[47]  | TAAACGTTAAACTAGCATGTCAAAAATCACC      |
| 21[80]  | 19[79]  | AATTTTGTAGCAAACAAGAGAATCAGCTGATA     |
| 21[112] | 22[128] | ATAGGAACAACAGTACCTTTTACACAGATGAA     |
| 21[144] | 19[143] | AACAATAACAGTACATAAATCAATCGTCGCTA     |
| 21[176] | 19[175] | ACCAAGTTAATTTTCAATTTGAATTATTGAAAAC   |
| 21[208] | 19[207] | TTCATTTACATCAAGAAAACAACTGAGAAG       |
| 22[31]  | 24[32]  | GTGGGAACCGTTGGTGTAGATGGGGTGCGGGC     |
| 22[63]  | 24[64]  | ATGTGAGCATCTGCCAGTTTGTAGGTCAGGCTG    |
| 22[127] | 21[111] | TATACAGTGCCATCAAAAATAATTTTAAACCA     |
| 22[159] | 24[160] | TGCGTAGAAGAAGGAGCGGAATTACGTATTAA     |
| 22[191] | 24[192] | ATTATTTGTATCAGATGATGGCAAAAGTATTA     |
| 22[223] | 24[224] | ATAATGGATGATTGTTTGGATTATTTTGCCTCAA   |
| 23[16]  | 21[15]  | ATAGGTCAAACGGCGGATTGACCTTTTCCAAAAA   |
| 23[48]  | 21[47]  | AACCGTGCGAGTAACAACCCGTCGTTAAATTG     |
| 23[80]  | 21[79]  | ACAGTATCGTAGCCAGCTTTCATCTCGCATT      |
| 23[112] | 24[128] | CCAGCTTACATTATCATTTTGCCTTAAAAG       |
| 23[144] | 21[143] | AAACCACCTTTTTCAGGTTTAAACGTTTCGGGAGA  |
| 23[176] | 21[175] | TTCCTGATCACGTAAAACAGAAATCTTTGAAT     |
| 23[208] | 21[207] | TATAATCCAGGGTTAGAACCTACCGGAATTA      |
| 24[31]  | 26[32]  | CTCTTCGCGCAAGGCGATTAAGTTTTCCACAC     |
| 24[63]  | 26[64]  | CGCAACTGTTCCAGTCACGACGTGTTTCCTG      |
| 24[95]  | 26[96]  | ACCAGGCAGTGCCAAGCTTGCATGCCGAGCTC     |
| 24[127] | 23[111] | TTGAGTACCGGCACCGCTTCTGGCACTCCAG      |



|         |         |                                       |
|---------|---------|---------------------------------------|
| 24[159] | 26[160] | ATCCTTTGGTTGGCAAATCAACAGGAGAGCCA      |
| 24[191] | 26[192] | GACTTTACAAGGTTATCTAAAATAAGTATTAA      |
| 24[223] | 26[224] | TAGATAATCAACTAATAGATTAGATTTTCCAGCAGA  |
| 25[16]  | 23[15]  | GATGTGCTTATTACGCCAGCTGGCTTTTGTAAATGGG |
| 25[48]  | 23[47]  | CCAGGGTTTTGGGAAGGGCGATCGCGCATCGT      |
| 25[80]  | 23[79]  | GACGGCCAAAGCGCCATTGCCCATGGACGACG      |
| 25[112] | 26[128] | TCGACTCTCAAATATCAAACCCTCTCACCTTG      |
| 25[144] | 23[143] | TCTGGTCACCCGAACGTTATTAATGAACAAAG      |
| 25[176] | 23[175] | AATTGAGGAAACAATTCGACAACCTTCATCATA     |
| 25[208] | 23[207] | AGCACTAAACATTTGAGGATTTAGTTCATCAA      |
| 26[31]  | 28[32]  | AACATACGCCTAATGAGTGAGCTAGCCCTTCA      |
| 26[63]  | 28[64]  | TGTGAAATTTGCGCTCACTGCCCGCTTTTCAC      |
| 26[95]  | 28[96]  | GAATTCGTCTGTGCGTGCCAGCTGCGGTTTGC      |
| 26[127] | 25[111] | CTGAACCTAGAGGATCCCCGGGTACCTGCAGG      |
| 26[159] | 28[160] | GCAGCAAAATATTTTTGAATGGCTACCAGTAA      |
| 26[191] | 28[192] | CACCGCCTCGAACTGATAGCCCTATTATTAC       |
| 26[223] | 28[224] | AGATAAAAAATACCGAACGAACCATTTTCTACATTT  |
| 27[16]  | 25[15]  | CTGGGGTGAGCCGGAAGCATAAAGTTTTGAAAGGGG  |
| 27[48]  | 25[47]  | TAATTGCGTGTTATCCGCTCACAAGGGTAACG      |
| 27[80]  | 25[79]  | TCGGGAAAAATCATGGTCATAGCTTGTA AAAAC    |
| 27[112] | 28[128] | AATCGGCCACCTGAAAGCGTAAGAAGATAGAA      |
| 27[144] | 25[143] | CACAGACATGAAAAATCTAAAGCAAATCAATA      |
| 27[176] | 25[175] | TTAATGCGGCAACAGTGCCACGCTTTGAAAGG      |
| 27[208] | 25[207] | CCATTAACAGAGGTGAGGCGGTCTCTTTAGG       |
| 28[31]  | 30[32]  | CCGCCTGGGGTTTGCCCCAGCAGGCGATGGCC      |
| 28[63]  | 30[64]  | CAGTGAGATGGTGGTTCCGAAATCAACGTCAA      |
| 28[95]  | 30[96]  | GTATTGGGAATCAAAGAATAGCCACAAGAGT       |
| 28[127] | 27[111] | CCCTTCTGAACGCGCGGGGAGAGGCATTAATG      |
| 28[159] | 30[160] | TAAAAGGGCAAACCTATCGGCCTTGGTCTGTCC     |
| 28[191] | 30[192] | ATTGGCAGCAATATTACCGCCAGCTTTTATAA      |
| 28[223] | 30[224] | TGACGCTCAGCTCATGAAATACTTTTCAGGAACG    |

|         |         |                                                 |
|---------|---------|-------------------------------------------------|
| 29[16]  | 27[15]  | TCCACGCTCCCTGAGAGAGTTGCATTTTTGTAAAGC            |
| 29[48]  | 27[47]  | CTGTTTGACGGGCAACAGCTGATTACTCACAT                |
| 29[80]  | 27[79]  | CCCTTATACGCCAGGGTGGTTTTTCTTTCCAG                |
| 29[112] | 30[128] | GGTTGAGTGAATAACATCACTTGAATACTTC                 |
| 29[144] | 27[143] | GAAGAACTACATTCTGGCCAACAGATACGTGG                |
| 29[176] | 27[175] | ATCCAGAAATTCACCAGTCACACGATTAGTCT                |
| 29[208] | 27[207] | CAGGAAAAAATCGTCTGAAATGGAAAACATCG                |
| 30[31]  | 31[39]  | CACTACGTGAGGTGCCGTAAAGCA                        |
| 30[63]  | 31[71]  | AGGGCGAAAAGGGAGCCCCGATT                         |
| 30[95]  | 31[103] | CCACTATTAAGCCGGCGAACGTGG                        |
| 30[127] | 29[111] | TTTGATTAGTTGTTCCAGTTTGGACGAGATAG                |
| 30[159] | 31[167] | ATCACGCATTGACGAGCACGTATA                        |
| 30[191] | 31[199] | TCAGTGAGAGAATCAGAGCGGGAG                        |
| 30[223] | 31[231] | GTACGCCATTAAAGGGATTTTAGA                        |
| 31[4]   | 29[15]  | TTTTCAAGTTTTTTGGGGTGAACCATCACCCAAATTTTTGCAAGCGG |
| 31[40]  | 29[47]  | CTAAATCGGAACCCTAAAACCGTCTATCAGGGCGAAAATC        |
| 31[72]  | 29[79]  | TAGAGCTTGACGGGAAAAGAACGTGGACTCCGGCAAAT          |
| 31[104] | 31[135] | CGAGAAAGGAAGGAATGCGCCGCTACAGGGC                 |
| 31[136] | 29[143] | GCGTACTATGGTTGCTAATTAACCGTTGTAGCCCTGAGTA        |
| 31[168] | 29[175] | ACGTGCTTTCCTCGTTGCCACCGAGTAAAAGACTGGTAAT        |
| 31[200] | 29[207] | CTAAACAGGAGGCCGAGAATCCTGAGAAGTGCATTGCAA         |
